# Supplementary material for: Evaluating Potential Response-Modifying Factors for Associations between Ozone and Health Outcomes: A Weight-of-Evidence Approach
Source: PubMed Central journal article supplement (PMC4216162; doi:10.1289/ehp.1307541), 2014-06-13
Supplement: ehp.1307541.s001.508.pdf [file ehp.1307541.s001.508.pdf]

## **Supplemental Material**

# **Evaluating Potential Response-Modifying Factors for Associations between Ozone and Health Outcomes: A Weight-of-Evidence Approach**

Lisa C. Vinikoor-Imler, Elizabeth O. Owens, Jennifer L. Nichols, Mary Ross, James S. Brown,  
and Jason D. Sack

| <b>Table of Contents</b>                                                                                                                        | <b>Page</b> |
|-------------------------------------------------------------------------------------------------------------------------------------------------|-------------|
| <b>Supplemental Information: Methods</b>                                                                                                        | <b>2</b>    |
| <b>Literature search strategy</b>                                                                                                               | <b>2</b>    |
| <b>Study selection and evaluation of individual study quality</b>                                                                               | <b>3</b>    |
| <b>Evaluation of scientific evidence and the causal framework</b>                                                                               | <b>4</b>    |
| <b>Table S1.</b> Table from the US EPA's Integrated Science Assessments, "Aspects to aid in judging causality"                                  | <b>6</b>    |
| <b>Table S2.</b> Weight of evidence for causal determination                                                                                    | <b>7</b>    |
| <b>Table S3.</b> Results from epidemiologic studies examining response modifying factors for O <sub>3</sub> -related health effects             | <b>8</b>    |
| <b>Table S4.</b> Results from controlled human exposure studies examining response modifying factors for O <sub>3</sub> -related health effects | <b>21</b>   |
| <b>Table S5.</b> Results from toxicological studies examining response modifying factors for O <sub>3</sub> -related health effects             | <b>25</b>   |
| <b>References</b>                                                                                                                               | <b>31</b>   |

## **Supplemental Information: Methods**

### **Literature search strategy**

The EPA maintains an ongoing literature search process for the identification of relevant scientific studies published since the last review of the National Ambient Air Quality Standard (NAAQS) (U.S. EPA 2011) for each criteria pollutant, including the O<sub>3</sub> Integrated Science Assessment (ISA). For the identification of new studies, search strategies are designed for pollutants and scientific disciplines and iteratively modified to optimize identification of pertinent publications. For this search, the terms “ozone”, “O<sub>3</sub>”, “smog”, and “photochemical oxidant(s)” were used in both PubMed and Web of Science. In addition, studies were identified for inclusion in the ISA in several ways: specialized searches on specific topics; independent review of tables of contents for journals in which relevant papers may be published; identification of relevant literature by expert scientists; review of citations in previous assessments and identification by the public and the Clean Air Scientific Advisory Committee (CASAC) (U.S. EPA 2014) during the external review process. Additionally, during the process of developing the O<sub>3</sub> Integrated Science Assessment (ISA), scientific publications are provided to the Agency by the public through a call for information in the Federal Register (U.S. EPA, 2008).

References identified through the multipronged search strategy were screened by title and abstract by scientists at the EPA. Non-English language papers were excluded. Those references that were potentially relevant after reading the title were “considered” for inclusion in the ISA and were added to the Health and Environmental Research Online (HERO) database developed by EPA; which is available to the public.

Only those studies that have undergone scientific peer review and have been published or accepted for publication and published reports that have undergone peer review were considered for inclusion. All relevant epidemiologic, controlled human exposure, toxicological, ecological, and welfare effects studies published since the last O<sub>3</sub> review were considered, including those related to exposure-response relationships, mode(s) of action (MOA), and response modifying factors that may increase or decrease the risk of an O<sub>3</sub>-related health effect in specific populations and lifestages. Studies and data analyses on atmospheric chemistry, air quality and emissions, environmental fate and transport, dosimetry, toxicokinetics and exposure were also considered for inclusion. This large global search identified approximately 22,000 studies that examined both health and ecological effects and O<sub>3</sub> exposure.

### **Study selection and evaluation of individual study quality**

After the literature search was conducted the selection of studies considered for inclusion was based on the extent to which the study is informative and policy-relevant. This evaluation was performed by scientists at the EPA for studies of health, ecological, and welfare effects; however for this paper we focus on the identification and evaluation of health effects studies.

In general, in assessing the scientific quality of health effects studies, the following considerations were taken into account.

- Were study design, study groups, methods, data, and results clearly presented to allow for study evaluation?
- Were the study site(s), study populations, subjects, or organism models adequately selected, and are they sufficiently well-defined to allow for meaningful comparisons between study or exposure groups?

- Are the air quality data, exposure, or dose metrics of adequate quality and sufficiently representative of information regarding ambient conditions?
- Are the health effect measurements meaningful, valid and reliable?
- Were likely covariates or modifying factors adequately controlled or taken into account in the study design and statistical analysis?
- Do the analytical methods provide adequate sensitivity and precision to support conclusions?
- Were the statistical analyses appropriate, properly performed, and properly interpreted?

These criteria provide benchmarks for evaluating various studies and for focusing on the policy-relevant studies in assessing the body of health effects evidence. Of most relevance for inclusion are studies that provide useful qualitative or quantitative information on O<sub>3</sub> exposure-effect or exposure-response relationships at doses or concentrations relevant to ambient conditions that can inform decisions on whether to retain or revise the standards. Therefore, concentrations above 2 ppm were excluded from the review.

The results from the large global search were reduced using exclusion criteria (e.g. non-English language and not related to ambient air, such as disinfection byproducts) and targeted searches for key health endpoints to 4,057 references that were considered for inclusion in the O<sub>3</sub> ISA. A total of 2,270 references deemed by EPA scientists to be of high quality, based on the above considerations, was included in the final document.

### **Evaluation of scientific evidence and the causal framework**

To aid judgment in interpreting scientific results, various “aspects” of causality have been discussed by many philosophers and scientists. The “aspects” to judging causality developed by

Sir Austin Bradford Hill (Hill 1965) formed the basis for EPA's causal determination framework, but was modified to encompass a broader array of data (Table S1), i.e., epidemiologic, controlled human exposure, ecological, and animal toxicological studies, as well as in vitro data, and to be more consistent with EPA's Guidelines for Carcinogen Risk Assessment (U.S. EPA 2009; U.S. EPA 2005). Additionally this framework was developed to be specific to examining causality for health and welfare effects for pollutant exposures. Although these aspects provide a framework for assessing the evidence, they do not lend themselves to being considered in terms of simple formulas or fixed rules of the evidence necessary to lead to conclusions about causality (Hill 1965). Rather, these aspects provide a framework for systematic appraisal of the body of evidence, informed by peer and public comment and advice, which includes weighing alternative views on controversial issues. In addition, it is important to note that the aspects presented in Table S1 cannot be used as a strict checklist, but rather to determine the weight of the evidence for inferring causality. In particular, not meeting one or more of the principles does not automatically preclude a determination of causality [see discussion in (CDC 2004)]. Building off these aspects used to judge causality the US EPA developed a causal framework to draw conclusions regarding the causal relationship between relevant pollutant exposures and health or environmental effects as discussed in the O<sub>3</sub> ISA. This weight of evidence approach is detailed in Table S2. It is with these aspects in judging causality in mind that we modified the causality framework detailed in Table S2 to encompass examining response modifying factors, which is used to draw conclusions regarding whether a specific factor increases or decreases the risk of an air pollutant (i.e. O<sub>3</sub>)-related health effect.

**Table S1.** Table from the US EPA’s Integrated Science Assessments, “Aspects to aid in judging causality.”

| <b>Aspect</b>                                        | <b>Description</b>                                                                                                                                                                                                                                                                                                                                                                                                                                                                                                                                                                                                                                                                                                                                                    |
|------------------------------------------------------|-----------------------------------------------------------------------------------------------------------------------------------------------------------------------------------------------------------------------------------------------------------------------------------------------------------------------------------------------------------------------------------------------------------------------------------------------------------------------------------------------------------------------------------------------------------------------------------------------------------------------------------------------------------------------------------------------------------------------------------------------------------------------|
| Consistency of the observed association              | An inference of causality is strengthened when a pattern of elevated risks is observed across several independent studies. The reproducibility of findings constitutes one of the strongest arguments for causality. If there are discordant results among investigations, possible reasons such as differences in exposure, confounding factors, and the power of the study are considered.                                                                                                                                                                                                                                                                                                                                                                          |
| Coherence                                            | An inference of causality from one line of evidence (e.g., epidemiologic, clinical, or animal studies) may be strengthened by other lines of evidence that support a cause-and-effect interpretation of the association. Evidence on ecological or welfare effects may be drawn from a variety of experimental approaches (e.g., greenhouse, laboratory, and field) and subdisciplines of ecology (e.g., community ecology, biogeochemistry, and paleontological/historical reconstructions). The coherence of evidence from various fields greatly adds to the strength of an inference of causality. In addition, there may be coherence in demonstrating effects across multiple study designs or related health endpoints within one scientific line of evidence. |
| Biological plausibility.                             | An inference of causality tends to be strengthened by consistency with data from experimental studies or other sources demonstrating plausible biological mechanisms. A proposed mechanistic linking between an effect and exposure to the agent is an important source of support for causality, especially when data establishing the existence and functioning of those mechanistic links are available.                                                                                                                                                                                                                                                                                                                                                           |
| Biological gradient (exposure-response relationship) | A well-characterized exposure-response relationship (e.g., increasing effects associated with greater exposure) strongly suggests cause and effect, especially when such relationships are also observed for duration of exposure (e.g., increasing effects observed following longer exposure times).                                                                                                                                                                                                                                                                                                                                                                                                                                                                |
| Strength of the observed association                 | The finding of large, precise risks increases confidence that the association is not likely due to chance, bias, or other factors. However, it is noted that a small magnitude in an effect estimate may represent a substantial effect in a population.                                                                                                                                                                                                                                                                                                                                                                                                                                                                                                              |
| Experimental evidence                                | Strong evidence for causality can be provided through “natural experiments” when a change in exposure is found to result in a change in occurrence or frequency of health or welfare effects.                                                                                                                                                                                                                                                                                                                                                                                                                                                                                                                                                                         |
| Temporal relationship of the observed association    | Evidence of a temporal sequence between the introduction of an agent, and appearance of the effect, constitutes another argument in favor of causality.                                                                                                                                                                                                                                                                                                                                                                                                                                                                                                                                                                                                               |
| Specificity of the observed association              | Evidence linking a specific outcome to an exposure can provide a strong argument for causation. However, it must be recognized that rarely, if ever, does exposure to a pollutant invariably predict the occurrence of an outcome, and that a given outcome may have multiple causes.                                                                                                                                                                                                                                                                                                                                                                                                                                                                                 |
| Analogy                                              | Structure activity relationships and information on the agent’s structural analogs can provide insight into whether an association is causal. Similarly, information on mode of action for a chemical, as one of many structural analogs, can inform decisions regarding likely causality.                                                                                                                                                                                                                                                                                                                                                                                                                                                                            |

Source: U.S. EPA, 2013.

**Table S2.** Weight of evidence for causal determination.

|                                           | <b>Health effects</b>                                                                                                                                                                                                                                                                                                                                                                                                                                                                                                                                                                                                                                                                                                                                                                                      |
|-------------------------------------------|------------------------------------------------------------------------------------------------------------------------------------------------------------------------------------------------------------------------------------------------------------------------------------------------------------------------------------------------------------------------------------------------------------------------------------------------------------------------------------------------------------------------------------------------------------------------------------------------------------------------------------------------------------------------------------------------------------------------------------------------------------------------------------------------------------|
| Causal relationship                       | Evidence is sufficient to conclude that there is a causal relationship with relevant pollutant exposures (i.e., doses or exposures generally within one to two orders of magnitude of current levels). That is, the pollutant has been shown to result in health effects in studies in which chance, bias, and confounding could be ruled out with reasonable confidence. For example: a) controlled human exposure studies that demonstrate consistent effects; or b) observational studies that cannot be explained by plausible alternatives or are supported by other lines of evidence (e.g., animal studies or mode of action information). Evidence includes multiple high-quality studies.                                                                                                         |
| Likely to be a causal relationship        | Evidence is sufficient to conclude that a causal relationship is likely to exist with relevant pollutant exposures, but important uncertainties remain. That is, the pollutant has been shown to result in health effects in studies in which chance and bias can be ruled out with reasonable confidence but potential issues remain. For example: a) observational studies show an association, but copollutant exposures are difficult to address and/or other lines of evidence (controlled human exposure, animal, or mode of action information) are limited or inconsistent; or b) animal toxicological evidence from multiple studies from different laboratories that demonstrate effects, but limited or no human data are available. Evidence generally includes multiple high-quality studies. |
| Suggestive of a causal relationship       | Evidence is suggestive of a causal relationship with relevant pollutant exposures, but is limited. For example, (a) at least one high-quality epidemiologic study shows an association with a given health outcome but the results of other studies are inconsistent; or (b) a well-conducted toxicological study, such as those conducted in the National Toxicology Program (NTP), shows effects in animal species,                                                                                                                                                                                                                                                                                                                                                                                      |
| Inadequate to infer a causal relationship | Evidence is inadequate to determine that a causal relationship exists with relevant pollutant exposures. The available studies are of insufficient quantity, quality, consistency, or statistical power to permit a conclusion regarding the presence or absence of an effect.                                                                                                                                                                                                                                                                                                                                                                                                                                                                                                                             |
| Not likely to be a causal relationship    | Evidence is suggestive of no causal relationship with relevant pollutant exposures. Several adequate studies, covering the full range of levels of exposure that human beings are known to encounter and considering at-risk populations, are mutually consistent in not showing an effect at any level of exposure.                                                                                                                                                                                                                                                                                                                                                                                                                                                                                       |

Source: U.S. EPA, 2013.

**Table S3.** Results from epidemiologic studies examining response modifying factors for O<sub>3</sub>-related health effects (listed in order of appearance within each section).

| Study                  | Location                  | Comparison populations               | Exposure duration                                                                                     | Health endpoint                                          | Effect estimate                | Results                                                                                                                                                                                                                                                                            |
|------------------------|---------------------------|--------------------------------------|-------------------------------------------------------------------------------------------------------|----------------------------------------------------------|--------------------------------|------------------------------------------------------------------------------------------------------------------------------------------------------------------------------------------------------------------------------------------------------------------------------------|
| <b>Lifestage</b>       |                           |                                      |                                                                                                       |                                                          |                                |                                                                                                                                                                                                                                                                                    |
| <b>Children</b>        |                           |                                      |                                                                                                       |                                                          |                                |                                                                                                                                                                                                                                                                                    |
| Halonen et al. 2009    | Helsinki, Finland         | <15yrs, 15-64 yrs, 65+ yrs           | Short-term; warm-season, median 8-h max 35.7 ppb                                                      | Asthma ED visits                                         | % change (95% CI) per 12.8 ppb | Asthma hospitalizations: <15 yrs: 12.6 (0.80, 25.8); Asthma-COPD hospitalizations: 15-64 yrs: 3.23 (-6.84, 14.4), 65+ yrs: 9.62 (2.02, 17.8)                                                                                                                                       |
| Middleton et al. 2008  | Nicosia, Cyprus           | <15 yrs, >15 yrs                     | Short-term; mean 8-h max ranged by location and season from 28.7 ppb (12.6 ppb) to 54.9 ppb (8.2 ppb) | All-cause hospitalizations, respiratory hospitalizations | % increase (95% CI) per 10 ppb | All-cause hospitalizations: <15 yrs: 1.58 (0.25, 2.92), >15 yrs: 0.15 (-0.62, 0.92); Respiratory hospitalizations: <15 yrs: 2.27 (-0.95, 5.60), >15 yrs: -1.65 (-4.89, 1.70)                                                                                                       |
| Silverman and Ito 2010 | New York City, U.S.       | <6 yrs, 6-18 yrs, 19-49 yrs, 50+ yrs | Short-term; median warm season 8-h max 41 ppb                                                         | Asthma-related hospitalizations                          | RR (95% CI) per 22 ppb         | ICU hospitalizations: <6 yrs: 0.96 (0.83, 1.11), 6-18 yrs: 1.19 (1.01, 1.40), 19-49 yrs: 1.03 (0.92, 1.16), 50+ yrs: 1.00 (0.90, 1.10); Non-ICU hospitalizations: <6 yrs: 1.09 (1.04, 1.15), 6-18 yrs: 1.20 (1.11, 1.29), 19-49 yrs: 1.08 (1.04, 1.12), 50+ yrs: 1.06 (1.02, 1.10) |
| Ko et al. 2007         | Hong Kong                 | 0-14 yrs, 15-65 yrs, 66+ yrs         | Short-term; mean 8-hr avg 21.7 ppb (11.9 ppb)                                                         | Asthma-related hospitalizations                          | RR (95% CI) per 5 ppb          | 0-14 yrs: 1.039 (1.030, 1.048), 15-65 yrs: 1.041 (1.032, 1.050), 66+ yrs: 1.023 (1.015, 1.030)                                                                                                                                                                                     |
| Paulu and Smith 2008   | Maine, U.S.               | 2-14 yrs, 15-34 yrs, 35-64 yrs       | Short-term; median warm-season 8-hr max ranged by year from 36 ppb to 42 ppb                          | Asthma-related ED visits                                 | % increase (95% CI) per 10 ppb | 2-14 yrs: 11 (1, 23), 15-34 yrs: 16 (8, 24); By Age and Sex: Males: 2-14 yrs: 17 (3, 32), 15-34 yrs: 10, 35-64 yrs: 11; Females: 2-14 yrs: 4, 15-34 yrs: 20 (10, 31), 35-64 yrs: 8                                                                                                 |
| Mar and Koenig 2009    | Seattle, Washington, U.S. | 0-18 yrs, 18+ yrs                    | Short-term; mean 1-h max 38.6 ppb                                                                     | Asthma-related ED visits                                 | RR (95% CI) per 10 ppb         | 0-18 yrs: 1.07 (0.99, 1.17), 18+ yrs: 1.06 (1.01, 1.12)                                                                                                                                                                                                                            |



| Study                          | Location        | Comparison populations                                                              | Exposure duration                                                                                    | Health endpoint | Effect estimate                                       | Results                                                                                                                                                                                                                                         |
|--------------------------------|-----------------|-------------------------------------------------------------------------------------|------------------------------------------------------------------------------------------------------|-----------------|-------------------------------------------------------|-------------------------------------------------------------------------------------------------------------------------------------------------------------------------------------------------------------------------------------------------|
| <b>Older adults</b>            |                 |                                                                                     |                                                                                                      |                 |                                                       |                                                                                                                                                                                                                                                 |
| Medina-Ramón and Schwartz 2008 | U.S.            | <65 yrs, 65+ yrs                                                                    | Short-term; median warm-season 8-hr avg ranged by city from 16.1 ppb to 58.8 ppb                     | Mortality       | Additional % change in 65+ compared to <65 per 10 ppb | 1.10 (95% CI 0.44, 1.77); By Age and Sex (compared to men in the same age groups): Women <60 yrs: -0.09 (-0.76, 0.58), Women 60+ yrs: 0.60 (0.25, 0.96)                                                                                         |
| Zanobetti and Schwartz 2008    | U.S.            | 0-20 yrs, 21-30 yrs, 31-40 yrs, 41-50 yrs, 51-60 yrs, 61-70 yrs, 71-80 yrs, 81+ yrs | Short-term; mean 8-hr avg ranged by season from 16.5 ppb to 47.8 ppb                                 | Mortality       | % increase (95% CI) per 10 ppb                        | 0-20 yrs: 0.08 (-0.42, 0.57), 21-30 yrs: 0.10 (-0.67, 0.87), 31-40 yrs: 0.07 (-0.38, 0.52), 41-50 yrs: 0.08 (-0.27, 0.43), 51-60 yrs: 0.54 (0.19, 0.89), 61-70 yrs: 0.38 (0.16, 0.61), 71-80 yrs: 0.50 (0.32, 0.67), 81+ yrs: 0.29 (0.13, 0.44) |
| Cakmak et al. 2007             | Chile           | <64 yrs, 65-74 yrs, 75-84 yrs, 85+ yrs                                              | Short-term; mean 1-h max 100.13 ppb                                                                  | Mortality       | % change (t-ratio) per 100.13 ppb                     | <64 yrs: 4.96 (1.17), 65-74 yrs: 8.00 (1.77), 75-84 yrs: 9.42 (2.28), 85+ yrs: 8.56 (2.02)                                                                                                                                                      |
| Cakmak et al. 2011             | Chile           | <64 yrs, 65-74 yrs, 75-84 yrs, 85+ yrs                                              | Short-term; avg 8-h max ozone ranged by city from 59 ppb (SD 56.6 ppb) to 87.6 ppb (86.2 ppb)        | Mortality       | RR (95% CI) per IQR                                   | <64 yrs: 1.033 (0.993, 1.076), 65-74 yrs: 1.033 (0.982, 1.088), 75-84 yrs: 1.073 (1.014, 1.135), 85+ yrs: 1.063 (1.012, 1.117)                                                                                                                  |
| Stafoggia et al. 2010          | Italy           | 35-64 yrs, 65-74 yrs, 75-84 yrs, 85+ yrs                                            | Short-term; mean 8-h moving avg ranged by city from 39.0 ppb (SD 10.3 ppb) to 57.7 ppb (SD 19.3 ppb) | Mortality       | % increase (95% CI) per 5 ppb                         | 35-64 yrs: 0.8 (-0.8, 2.5), 65-74 yrs: 0.9 (-0.5, 2.3), 75-84 yrs: 0.5 (-0.5, 1.5), 85+ yrs: 3.5 (2.4, 4.6)                                                                                                                                     |
| Kan et al. 2008                | Shanghai, China | 5-44 yrs, 45-64 yrs, 65+ yrs                                                        | Short-term; mean 8-h avg 31.7 ppb (SD 0.5 ppb)                                                       | Mortality       | % increase (95% CI) per 5 ppb                         | 5-44 yrs: -0.08 (-1.38, 1.25), 45-64 yrs: 0.47 (-0.19, 1.12), 65+ yrs: 0.32 (0.03, 0.61)                                                                                                                                                        |

| Study                   | Location             | Comparison populations | Exposure duration                                                                                                | Health endpoint                                                                                                                                 | Effect estimate                | Results                                                                                                                                                                                                                                                                                                                                                                                                                                                                                                                                                                                                                                       |
|-------------------------|----------------------|------------------------|------------------------------------------------------------------------------------------------------------------|-------------------------------------------------------------------------------------------------------------------------------------------------|--------------------------------|-----------------------------------------------------------------------------------------------------------------------------------------------------------------------------------------------------------------------------------------------------------------------------------------------------------------------------------------------------------------------------------------------------------------------------------------------------------------------------------------------------------------------------------------------------------------------------------------------------------------------------------------------|
| Katsouyanni et al. 2009 | U.S., Canada, Europe | <75 yrs, 75+ yrs       | Short-term; mean 1-h max ranged from 13.3-38.4 ppb in the US, 6.7-8.4 ppb in Canada, and 18.3-41.9 ppb in Europe | Mortality                                                                                                                                       | % change (95% CI) per 5 ppb    | All-cause mortality: United States: <75 yrs: 0.45 (0.15, 0.75), 75+ yrs: 0.32 (-0.04, 0.67); Canada: <75 yrs: 0.65 (-0.043, 1.3), 75+ yrs: 0.83 (0.11, 1.6); Europe: <75 yrs: 0.35 (0.12, 0.57), 75+ yrs: 0.11 (-0.10, 0.31); Cardiovascular mortality: United States: <75 yrs: 0.48 (-0.02, 0.98), 75+ yrs: 0.29 (-0.17, 0.75); Canada: <75 yrs: 0.83 (0.11, 1.6), 75+ yrs: 0.65 (-0.043, 1.3); Europe: <75 yrs: 0.25 (-0.14, 0.64), 75+ yrs: 0.26 (-0.03, 0.54)                                                                                                                                                                             |
| Halonen et al. 2009     | Helsinki, Finland    | 15-64 yrs, 65+ yrs     | Short-term; warm-season, median 8-h max 35.7 ppb                                                                 | Cardiovascular mortality, respiratory mortality, hospitalizations related to coronary heart disease, stroke, arrhythmia, pneumonia, asthma-COPD | % change (95% CI) per 12.8 ppb | Cardiovascular mortality: 15-64 yrs: 4.44 (-7.85, 18.4), 65+ yrs: 0.67 (-4.57, 6.20); Respiratory mortality: 15-64 yrs: 3.02 (-10.9, 19.1), 65+ yrs: 2.22 (-8.80, 14.6); Coronary heart disease hospitalizations: 15-64 yrs: 0.21 (-6.53, 7.43), 65+ yrs: -1.06 (-5.18, 3.23); Stroke hospitalizations: 15-64 yrs: 1.96 (-5.85, 10.4), 65+ yrs: 2.24 (-4.11, 9.02); Arrhythmia hospitalizations: 15-64 yrs: -4.04 (-13.3, 6.15), 65+ yrs: 0.10 (-5.91, 6.50); Pneumonia hospitalizations: 15-64 yrs: 0.98 (-8.23, 11.1), 65+ yrs: 0.09 (-5.40, 5.91); Asthma-COPD hospitalizations: 15-64 yrs: 3.23 (-6.84, 14.4), 65+ yrs: 9.62 (2.02, 17.8) |
| Arbex et al. 2009       | Sao Paulo, Brazil    | 40-64 yrs, 65+ yrs     | Short-term; mean 1-hr max 47.88 ppb (SD 22.12 ppb)                                                               | COPD-related ED visits                                                                                                                          |                                | Quantitative results not provided: no association present in any age group                                                                                                                                                                                                                                                                                                                                                                                                                                                                                                                                                                    |
| Buadong et al. 2009     | Bangkok, Thailand    | 15-64 yrs, 65+ yrs     | Short-term; mean 1-h avg 14.4 ppb                                                                                | Cardiovascular-related hospitalizations                                                                                                         | % change (95% CI) per 5 ppb    | 15-64 yrs: 0.01 (-0.28, 0.14), 65+ yrs: 0.50 (0.19, 0.81)                                                                                                                                                                                                                                                                                                                                                                                                                                                                                                                                                                                     |

| Study                 | Location          | Comparison populations | Exposure duration                                                                                     | Health endpoint                                                                                                                                       | Effect estimate                                                    | Results                                                                                                                                                                                                                                                                                                                                                                    |
|-----------------------|-------------------|------------------------|-------------------------------------------------------------------------------------------------------|-------------------------------------------------------------------------------------------------------------------------------------------------------|--------------------------------------------------------------------|----------------------------------------------------------------------------------------------------------------------------------------------------------------------------------------------------------------------------------------------------------------------------------------------------------------------------------------------------------------------------|
| <b>Sex</b>            |                   |                        |                                                                                                       |                                                                                                                                                       |                                                                    |                                                                                                                                                                                                                                                                                                                                                                            |
| Cakmak et al. 2006b   | Canada            | Male, Female           | Short-term; mean daily avg 17.4 ppb (SD 21.4 ppb)                                                     | Respiratory hospitalizations                                                                                                                          | % change (95% CI) per 17.4 ppb                                     | Male: 4.5 (2.6, 6.3), Female: 3.6 (1.6, 5.7)                                                                                                                                                                                                                                                                                                                               |
| Middleton et al. 2008 | Nicosia, Cyprus   | Male, Female           | Short-term; mean 8-h max ranged by location and season from 28.7 ppb (12.6 ppb) to 54.9 ppb (8.2 ppb) | All-cause hospitalization, respiratory hospitalization, cardiovascular hospitalizations                                                               | Percent increase (95% CI)                                          | All-cause hospitalizations: Male: 0.58 (-0.35, 1.52), Female: 0.45 (-0.50, 1.41); Respiratory hospitalizations: Male: -1.76 (-4.63, 1.19), Female: 3.89 (0.12, 7.80); Cardiovascular hospitalizations: Male: 0 (-2.17, 2.22), Female: 1.93 (-1.03, 4.97)                                                                                                                   |
| Arbex et al. 2009     | Sao Paulo, Brazil | Male, Female           | Short-term; mean 1-hr max 47.88 ppb (SD 22.12 ppb)                                                    | COPD-related ED visits                                                                                                                                | % change (95% CI) per 27.93 ppb                                    | Males: quantitative results not provided - no association observed, Females: 2.3 (0.0, 4.5)                                                                                                                                                                                                                                                                                |
| Wong et al. 2009      | Hong Kong         | Male, Female           | Short-term; mean 8-h avg 18.45 ppb (SD 11.5 ppb)                                                      | Respiratory-related hospitalization, acute respiratory-related hospitalization, COPD-related hospitalization, cardiovascular-related hospitalizations | Excess risk (95% CI) at mean level of influenza activity per 5 ppb | Respiratory-related hospitalizations: Male: 0.84 (0.57, 1.11), Female: 0.87 (0.56, 1.19); Acute respiratory-related hospitalizations: Male: 1.03 (0.63, 1.44), Female: 0.63 (0.18, 1.09); COPD-related hospitalizations: Male: 0.93 (0.51, 1.35), Female: 2.19 (1.63, 2.75); Cardiovascular-related hospitalizations: Male: 0.11 (-0.21, 0.44), Female: 0.25 (-0.07, 0.58) |
| Paulu and Smith 2008  | Maine, U.S.       | Male, Female           | Short-term; median warm-season 8-hr max ranged by year from 36 ppb to 42 ppb                          | Asthma-related ED visits                                                                                                                              | % increase (95% CI) per 10 ppb                                     | Males: 11 (4, 18), Females: 12 (6, 18); By Age and Sex: Males: 2-14 yrs: 17 (3, 32), 15-34 yrs: 10, 35-64 yrs: 11; Females: 2-14 yrs: 4, 15-34 yrs: 20 (10, 31), 35-64 yrs: 8                                                                                                                                                                                              |
| Thaller et al. 2008   | Galveston, TX     | Male, Female           | Short-term; range of daily avg from 14.62 ppb to 88.69 ppb                                            | FVC, FEV <sub>1</sub> /FVC                                                                                                                            | % change per 10 ppm                                                | FVC: Males: -0.04 (-0.3, 0.4), Females: 0.32 (-0.2, 0.8); FEV <sub>1</sub> /FVC: Males: -0.2 (-0.4, 0.03), Females: -0.4 (-0.7, -0.1)                                                                                                                                                                                                                                      |

| Study                          | Location                      | Comparison populations | Exposure duration                                                                                      | Health endpoint                                                          | Effect estimate                | Results                                                                                                                                                                       |
|--------------------------------|-------------------------------|------------------------|--------------------------------------------------------------------------------------------------------|--------------------------------------------------------------------------|--------------------------------|-------------------------------------------------------------------------------------------------------------------------------------------------------------------------------|
| Lin et al. 2005                | Toronto, Canada               | Male, Female           | Short-term; mean 1-h max 38.06 ppb (17.48 ppb)                                                         | Respiratory-infection hospitalizations among children under 15 years old | OR (95% CI) per 21.8 ppb       | Males: 1.08 (0.89, 1.31), Females: 1.18 (0.94, 1.47)                                                                                                                          |
| Lin et al. 2008                | New York State, United States | Male, Female           | Short-term; mean 8-h max 41.06 ppb                                                                     | Asthma-related hospitalizations among children ages 1-6 years            |                                | Quantitative results not provided "nonsignificant difference"                                                                                                                 |
| Villeneuve et al. 2006         | Edmonton, Canada              | Male, Female           | Short-term; mean daily max 31.2 ppm                                                                    | Stroke-related ED visits                                                 |                                | Quantitative results not provided; no difference apparent in figures with estimates stratified by sex                                                                         |
| Henrotin et al. 2007           | Dijon, France                 | Male, Female           | Short-term; mean 8-h 14.95 ppb (10.75 ppb)                                                             | Ischemic stroke                                                          | OR (95% CI) per 5 ppb          | Male: 1.058 (0.987, 1.134), Female: 1.036 (0.969, 1.106)                                                                                                                      |
| Cakmak et al. 2006a            | Canada                        | Male, Female           | Short-term; mean daily avg 17.4 ppb (SD 21.4 ppb)                                                      | Cardiac hospitalizations                                                 | % change (95% CI) per 17.4 ppb | Male: 1.4 (0.9, 1.9), Female: 2.7 (0.2, 5.2)                                                                                                                                  |
| Medina-Ramón and Schwartz 2008 | U.S.                          | Male, Female           | Short-term; median warm-season 8-hr avg ranged by city from 16.1 ppb to 58.8 ppb                       | Mortality                                                                | Additional % change per 10 ppb | Women compared to men: 0.58 (95% CI 0.18, 0.98); By Age and Sex (compared to men in the same age groups): Women <60yrs: -0.09 (-0.76, 0.58), Women 60+ yrs: 0.60 (0.25, 0.96) |
| Stafoggia et al. 2010          | Italy                         | Male, Female           | Short-term; mean 8-h moving avg ranged by city from 38.95 ppb (SD 10.25 ppb) to 57.7 ppb (SD 19.3 ppb) | Mortality                                                                | % increase (95% CI) per 5 ppb  | Male: 0.8 (-0.1, 1.8), Female: 2.2 (1.4, 3.1)                                                                                                                                 |
| Kan et al. 2008                | Shanghai, China               | Male, Female           | Short-term; mean 8-h avg 31.65 ppb (SD 0.5 ppb)                                                        | Mortality                                                                | % increase (95% CI) per 5 ppb  | Male: 0.19 (-0.16, 0.55), Female: 0.40 (0.03, 0.76)                                                                                                                           |
| Cakmak et al. 2011             | Chile                         | Male, Female           | Short-term; avg 8-h max ozone ranged by city from 59 ppb (SD 56.6 ppb) to 87.6 ppb (86.2 ppb)          | Mortality                                                                | RR (95% CI) per IQR            | Male: 1.052 (1.011, 1.094), Female: 1.042 (1.006, 1.080)                                                                                                                      |

| Study                       | Location            | Comparison populations                                    | Exposure duration                                                | Health endpoint                                                                | Effect estimate                              | Results                                                                                                                                                                                                                                                                                                                                                                                                                                                                                                                                                   |
|-----------------------------|---------------------|-----------------------------------------------------------|------------------------------------------------------------------|--------------------------------------------------------------------------------|----------------------------------------------|-----------------------------------------------------------------------------------------------------------------------------------------------------------------------------------------------------------------------------------------------------------------------------------------------------------------------------------------------------------------------------------------------------------------------------------------------------------------------------------------------------------------------------------------------------------|
| <b>Asthma</b>               |                     |                                                           |                                                                  |                                                                                |                                              |                                                                                                                                                                                                                                                                                                                                                                                                                                                                                                                                                           |
| Thaller et al. 2008         | Galveston, TX       | Asthma, no asthma                                         | Short-term; median daily avg 26 ppb, median daily maximum 35 ppb | FVC, FEV <sub>1</sub> /FVC per 10 ppm O <sub>3</sub>                           | % change for daily avg or max O <sub>3</sub> | FVC, daily avg O <sub>3</sub> : Asthmatic: $\beta$ -0.4 (95% CI -1.1, 0.4), Non-asthmatic: $\beta$ 0.09 (95% CI -0.2, 0.4); FVC, daily max O <sub>3</sub> : Asthmatic: $\beta$ -0.07 (95% CI -0.5, -0.4), Non-asthmatic: $\beta$ 0.09 (95% CI -0.07, 2.5); FEV <sub>1</sub> /FVC, daily avg O <sub>3</sub> : Asthmatic: $\beta$ -0.6 (95% CI -1.1, -0.08), Non-asthmatic: $\beta$ -0.2 (95% CI -0.4, -0.02); FEV <sub>1</sub> /FVC, daily max O <sub>3</sub> : Asthmatic: $\beta$ -0.4 (95% CI -0.7, -0.08), Non-asthmatic: $\beta$ -0.1 (95% CI -0.2, 0) |
| Escamilla-Nuñez et al. 2008 | Mexico City, Mexico | Asthma, no asthma                                         | Short-term; 1-hr daily maximum avg 86.5 ppb (SD 34.4 ppb)        | Coughing events, wheezing events per IQR (48.0 ppb) in O <sub>3</sub>          | % change                                     | Coughing events: Asthmatic: RR 8.9 (95% CI 3.0, 15.1), Non-asthmatic: data not provided "no significant association"; Wheezing events: Asthmatic: RR 10.0 (95% CI 3.2, 17.3), Non-asthmatic: data not provided "no significant association"                                                                                                                                                                                                                                                                                                               |
| Alexeeff et al. 2007        | Boston, MA          | Airway hyperresponsiveness, no airway hyperresponsiveness | Short-term; mean 2-d avg 24.4 ppb (SD 11.0 ppb)                  | Lung function (% change in FEV <sub>1</sub> and FVC) per 15 ppb O <sub>3</sub> | % change                                     | FEV <sub>1</sub> : Nonresponder: OR -1.28 (95% CI -2.01, -0.54), Responder: OR -3.04 (95% CI -4.70, -1.34); FVC: Nonresponder: OR -1.29 (95% CI -1.96, -0.61), Responder: OR -2.03 (95% CI -3.57, -0.46)                                                                                                                                                                                                                                                                                                                                                  |

| Study                          | Location            | Comparison populations                                         | Exposure duration                                      | Health endpoint                                                                                    | Effect estimate       | Results                                                                                                                                                                                                                                                                                                                                                                                                                                                                                                                                                                |
|--------------------------------|---------------------|----------------------------------------------------------------|--------------------------------------------------------|----------------------------------------------------------------------------------------------------|-----------------------|------------------------------------------------------------------------------------------------------------------------------------------------------------------------------------------------------------------------------------------------------------------------------------------------------------------------------------------------------------------------------------------------------------------------------------------------------------------------------------------------------------------------------------------------------------------------|
| Barraza-Villarreal et al. 2008 | Mexico City, Mexico | Asthma, no asthma                                              | Short-term; mean 8-h moving avg 31.6 ppb (SD 11.5 ppb) | FeNO, IL-8, pH_EBC, FEV <sub>1</sub> , FVC, FEV <sub>25-75</sub> per IQR (22.0 ppb) O <sub>3</sub> | Linear model, $\beta$ | FeNO: Asthmatic: 1.06 (95% CI 1.02, 1.09), Non-asthmatic: 1.11 (95% CI 0.92, 1.33); IL-8: Asthmatic: 1.18 (95% CI 1.04, 1.34), Non-asthmatic: 1.19 (95% CI 1.00, 1.45); pH_EBC: Asthmatic: -0.07 (95% CI -0.15, -0.01), Non-asthmatic: -0.07 (95% CI -0.20, 0.05); FEV <sub>1</sub> : Asthmatic: -1.64 (95% CI -28.0, 25.1), Non-asthmatic: -21.3 (95% CI -66.5, 23.9); FVC: Asthmatic: -13.5 (95% CI -45.0, 19.0), Non-asthmatic: -23.6 (95% CI -75.0, 28.1); FEV <sub>25-75</sub> : Asthmatic: 24.3 (95% CI -29.0, 78.2), Non-asthmatic: -14.5 (95% CI -118.7, 89.5) |
| Berhane et al. 2011            | Southern CA         | Asthma, no asthma; respiratory allergy, no respiratory allergy | Short-term; 8-hr daily avg, IQR 15.42 ppb              | FeNO change per IQR (15.42 ppb) O <sub>3</sub>                                                     | % change              | Asthmatic: $\beta$ 12.6 (95% CI -0.7, 27.7), Non-asthmatic: $\beta$ 14.5 (95% CI 5.3, 24.4); Respiratory allergy: $\beta$ 15.4 (95% CI 6.0, 25.7), No respiratory allergy: $\beta$ 12.4 (95% CI 2.7, 23.0)                                                                                                                                                                                                                                                                                                                                                             |
| <b>Obesity</b>                 |                     |                                                                |                                                        |                                                                                                    |                       |                                                                                                                                                                                                                                                                                                                                                                                                                                                                                                                                                                        |
| Alexeeff et al. 2007           | Boston, MA          | BMI <30 kg/m <sup>2</sup> , BMI $\geq$ 30 kg/m <sup>2</sup>    | Short-term; mean 2-d avg 24.4 ppb (SD 11.0 ppb)        | Lung function (% change in FEV <sub>1</sub> and FVC) per 15 ppb O <sub>3</sub>                     | % change              | FEV <sub>1</sub> : BMI <30 kg/m <sup>2</sup> : OR -1.15 (95% CI -1.91, -0.39), BMI $\geq$ 30 kg/m <sup>2</sup> : OR -2.63 (95% CI -3.85, -1.39); FVC: BMI <30 kg/m <sup>2</sup> : OR -1.18 (95% CI -1.88, -0.48), BMI $\geq$ 30 kg/m <sup>2</sup> : OR -2.05 (95% CI -3.17, -0.91)                                                                                                                                                                                                                                                                                     |

| Study              | Location            | Comparison populations                              | Exposure duration                        | Health endpoint              | Effect estimate                                                                                                   | Results                                                                                                                                                                                                                                                                                                                                                                                                             |
|--------------------|---------------------|-----------------------------------------------------|------------------------------------------|------------------------------|-------------------------------------------------------------------------------------------------------------------|---------------------------------------------------------------------------------------------------------------------------------------------------------------------------------------------------------------------------------------------------------------------------------------------------------------------------------------------------------------------------------------------------------------------|
| <b>Diet</b>        |                     |                                                     |                                          |                              |                                                                                                                   |                                                                                                                                                                                                                                                                                                                                                                                                                     |
| Romieu et al. 2009 | Mexico City, Mexico | Fruit and vegetable index, Mediterranean diet index | Short-term; mean 8-h moving avg 31.6 ppb | IL-8, FEV <sub>1</sub> , FVC | Coefficient (SE) for the relationship between increasing dietary index and outcomes by quartile of ozone exposure | Fruit and vegetable index: IL-8: ≤25 ppb: -0.125 (0.094), ≥38 ppb: -0.219 (0.084), FEV <sub>1</sub> : ≤25 ppb: 0.049 (0.061), ≥38 ppb: 0.099 (0.058), FVC: ≤25 ppb: 0.065 (0.069), ≥38 ppb: 0.137 (0.066); Mediterranean diet index: IL-8: ≤25 ppb: -0.020 (0.055), ≥38 ppb: -0.022 (0.048), FEV <sub>1</sub> : ≤25 ppb: 0.048 (0.033), ≥38 ppb: 0.051 (0.032), FVC: ≤25 ppb: 0.048 (0.037), ≥38 ppb: 0.081 (0.036) |

| Study                    | Location | Comparison populations                                                                | Exposure duration                              | Health endpoint                                                                                                   | Effect estimate | Results                                                                                                                                                                                                                                                                                                                                                                                                                                                                                                                                                                                                                                                                                                                                                                                                                                                                                                                                                                                                                                                                                                                                                                                                                                               |
|--------------------------|----------|---------------------------------------------------------------------------------------|------------------------------------------------|-------------------------------------------------------------------------------------------------------------------|-----------------|-------------------------------------------------------------------------------------------------------------------------------------------------------------------------------------------------------------------------------------------------------------------------------------------------------------------------------------------------------------------------------------------------------------------------------------------------------------------------------------------------------------------------------------------------------------------------------------------------------------------------------------------------------------------------------------------------------------------------------------------------------------------------------------------------------------------------------------------------------------------------------------------------------------------------------------------------------------------------------------------------------------------------------------------------------------------------------------------------------------------------------------------------------------------------------------------------------------------------------------------------------|
| Sienra-Monge et al. 2004 | Mexico   | Vitamin supplementation (50 mg/day of vitamin E and 250 mg/day of vitamin C), Placebo | Short-term; mean ozone 8-h moving avg 66.2 ppb | Inflammation per 100 ppb O <sub>3</sub> (interleukin-6 (IL-6), interleukin-8 (IL-8), glutathione (GSx), uric acid | $\beta$         | IL-6, 1-day lag: Placebo 0.98 (SE 0.44; p-value 0.02), Supplement -0.02 (SE 0.42; p-value 0.97); IL-6, 3-day lag: Placebo 1.07 (SE 0.30; p-value <0.01), Supplement -0.04 (SE 0.31; p-value 0.90); IL-6, 3-day cumulative: Placebo 1.44 (SE 0.47; p-value <0.01), Supplement 0.09 (SE 0.52; p-value 0.86); IL-8, 1-day lag: Placebo 0.80 (SE 0.49; p-value 0.10), Supplement -0.26 (SE 0.49; p-value 0.60); IL-8, 3-day lag: Placebo 0.78 (SE 0.37; p-value 0.04), Supplement 0.29 (SE 0.38; p-value 0.45); IL-8, 3-day cumulative: Placebo 1.15 (SE 0.55; p-value 0.04), Supplement 0.02 (SE 0.62; p-value 0.98); GSx, 2-day lag: Placebo -0.13 (SE 0.15; p-value 0.39), Supplement -0.29 (SE 0.13; p-value 0.03); GSx, 3-day lag: Placebo -0.27 (SE 0.10; p-value <0.01), Supplement -0.06 (SE 0.09; p-value 0.51); GSx, 3-day cumulative: Placebo -0.35 (SE 0.16; p-value 0.03), Supplement -0.33 (SE 0.14; p-value 0.02); Uric acid, 2-day lag: Placebo -0.25 (SE 0.38; p-value 0.51), Supplement 0.08 (SE 0.41; p-value 0.85); Uric acid, 3-day lag: Placebo -0.34 (SE 0.27; p-value 0.20), Supplement 0.41 (SE 0.28; p-value 0.14); Uric acid, 3-day cumulative: Placebo -0.42 (SE 0.40; p-value 0.30), Supplement 0.34 (SE 0.46; p-value 0.46) |



| Study                  | Location        | Comparison populations                                                                                                                                                                                | Exposure duration                                          | Health endpoint                                                     | Effect estimate                                                                                                 | Results                                                                                                                                                                                                                                                                                                                             |
|------------------------|-----------------|-------------------------------------------------------------------------------------------------------------------------------------------------------------------------------------------------------|------------------------------------------------------------|---------------------------------------------------------------------|-----------------------------------------------------------------------------------------------------------------|-------------------------------------------------------------------------------------------------------------------------------------------------------------------------------------------------------------------------------------------------------------------------------------------------------------------------------------|
| <b>SES</b>             |                 |                                                                                                                                                                                                       |                                                            |                                                                     |                                                                                                                 |                                                                                                                                                                                                                                                                                                                                     |
| Cakmak et al. 2006b    | Canada          | Neighborhood-level education (< grade 9, grades 9-13, some university or trade school, university diploma) and neighborhood-level income (<\$21,309, \$21,309-\$28,161, \$28,161-\$35,905, >\$35,905) | Short-term; mean daily avg 17.4 ppb (SD 21.4 ppb)          | Respiratory hospitalizations                                        | % change (95% CI) per 17.4 ppb                                                                                  | Neighborhood-level education: < grade 9: 4.0 (1.6, 6.5), grades 9-13: 1.4 (-1.6, 4.4), some university or trade school: 1.1 (-1.6, 4.0), university diploma: 0.5 (-2.5, 3.5); Neighborhood-level income: <\$21,309: 2.8 (0.4, 5.1), \$21,309-\$28,161: 5.6 (3.0, 8.2), \$28,161-\$35,905: 2.9 (0.1, 5.7), >\$35,905: 4.6 (1.8, 7.5) |
| Lee et al. 2006        | Seoul, Korea    | Neighborhood level insurance rate (lower, intermediate, upper)                                                                                                                                        | Short-term; mean 8-h max avg 29.83 ppb (SD 16.87 ppb)      | Asthma-related hospitalizations for children <15 yrs                | RR (95% CI) per IQR (ranged 23.94 ppb to 33 ppb by grp)                                                         | Lower: 1.32 (1.11, 1.58), Intermediate: 1.24 (1.08, 1.43), Upper: 1.12 (1.00, 1.25)                                                                                                                                                                                                                                                 |
| Burra et al. 2009      | Toronto, Canada | Quintiles of neighborhood average household income (quintile 1: \$18,901-\$42,688; quintile 5: \$76,032-\$245,701)                                                                                    | Short-term; avg daily 1-h max ozone 33.3 ppb (SD 16.4 ppb) | Ambulatory physician visits for asthma among children aged 1-17 yrs | RR (95% CI)                                                                                                     | Quintile 1: Males 0.961 (95% CI 0.956, 0.966), Females 0.955 (95% CI 0.949, 0.961); Quintile 5: Males 0.966 (95% CI 0.961, 0.972), Females 0.962 (95% CI 0.955, 0.969)                                                                                                                                                              |
| Cakmak et al. 2006a    | Canada          | Neighborhood-level education (quartiles) and neighborhood-level income (quartiles: <\$21,309, \$21,309-\$28,161, \$28,161-\$35,905, >\$35,905)                                                        | Short-term; mean daily avg 17.4 ppb (SD 21.4 ppb)          | Cardiac hospitalizations                                            | % change (95% CI) per 17.4 ppb                                                                                  | Neighborhood-level education: First quartile: 1.4 (-0.9, 3.7), Second quartile: -2.8 (-8.6, 3.0), Third quartile: 6.0 (0.2, -11.8), Fourth quartile: 2.2 (-3.8, 8.2); Neighborhood-level income: <\$21,309: 1.8 (-0.7, 4.3), \$21,309-\$28,161: 1.0 (-2.0, 4.0), \$28,161-\$35,905: 3.0 (0.6, 5.4), >\$35,905: 1.3 (-1.7, 4.3)      |
| Bell and Dominici 2008 | U.S.            | Unemployment, poverty, median income                                                                                                                                                                  | Short-term; mean daily ozone 26.8 ppb (IQR 6.4 ppb)        | Mortality                                                           | % change in effect estimate (95% PI) for O <sub>3</sub> and mortality per IQR increase in neighborhood variable | Unemployment: 68.3 (3.02, 133.7), Poverty: 35.4 (-24.7, 95.4), Median income: 9.34 (-42.5, 61.2); Adjusted for neighborhood variable: Unemployment: 0.49 (0.26, 0.73), Poverty: 0.51 (0.27, 0.75), Median income: 0.52 (0.28, 0.77)                                                                                                 |

| Study                   | Location             | Comparison populations                                                                                                                                                                                                                                                                    | Exposure duration                                                                                                | Health endpoint                                                  | Effect estimate               | Results                                                                                                                                                                                                                                                                                                                                                                                                                                                                                                                                                        |
|-------------------------|----------------------|-------------------------------------------------------------------------------------------------------------------------------------------------------------------------------------------------------------------------------------------------------------------------------------------|------------------------------------------------------------------------------------------------------------------|------------------------------------------------------------------|-------------------------------|----------------------------------------------------------------------------------------------------------------------------------------------------------------------------------------------------------------------------------------------------------------------------------------------------------------------------------------------------------------------------------------------------------------------------------------------------------------------------------------------------------------------------------------------------------------|
| Katsouyanni et al. 2009 | U.S., Canada, Europe | Unemployment                                                                                                                                                                                                                                                                              | Short-term; mean 1-h max ranged from 13.3-38.4 ppb in the US, 6.7-8.4 ppb in Canada, and 18.3-41.9 ppb in Europe | Mortality                                                        | % change (95% CI) per 5 ppb   | United States: 25%ile of unemployment: 0.02 (-0.10, 0.15), 75%ile of unemployment: 0.19 (0.09, 0.29); Canada: 25%ile of unemployment: 0.35 (0.18, 0.51), 75%ile of unemployment: 0.47 (0.32, 0.61); Europe: 25%ile of unemployment: 0.18 (-0.06, 0.42), 75%ile of unemployment: 0.17 (-0.06, 0.40)                                                                                                                                                                                                                                                             |
| Cakmak et al. 2011      | Chile                | Individual education (primary school not completed, primary school completed, high school completed, some college, college completed), Neighborhood income quartile (<\$8800, \$8800-\$10,651, \$10,651-\$13,395, >\$13,395), Employment category (unemployed, blue-collar, white-collar) | Short-term; avg 8-h max ozone ranged by city from 59 ppb (SD 56.6 ppb) to 87.6 ppb (86.2 ppb)                    | Mortality                                                        | RR (95% CI) per IQR           | Individual education: Primary school not completed: 1.094 (1.039, 1.140), Primary school completed: 1.061 (1.016, 1.106), High school completed: 1.050 (1.007, 1.092), Some college: 1.037 (0.995, 1.080), College completed: 1.034 (0.991, 1.078); Neighborhood income quartile: <\$8800: 1.081 (1.049, 1.113), \$8800-\$10,651: 1.062 (1.027, 1.097), \$10,651-\$13,395: 1.030 (1.000, 1.060), >\$13,395: 1.023 (0.994, 1.052); Employment category: Unemployed: 1.089 (1.032, 1.146), Blue-collar: 1.028 (0.994, 1.061), White-collar: 0.980 (0.931, 1.029) |
| Kan et al. 2008         | Shanghai, China      | Individual low education (illiterate or primary school, high education (middle school or more)                                                                                                                                                                                            | Short-term; mean 8-h avg 31.65 ppb (SD 0.5 ppb)                                                                  | Total mortality, cardiovascular mortality, respiratory mortality | % increase (95% CI) per 5 ppb | Total mortality: Low education: 0.26 (-0.09, 0.60), High education: 0.30 (-0.11, 0.71); Cardiovascular mortality: Low education: 0.39 (-0.13, 0.90), High education: 0.26 (-0.38, 0.91); Respiratory mortality: Low education: 0.20 (-0.74, 1.16), High education: 0.27 (-0.86, 1.41)                                                                                                                                                                                                                                                                          |

| Study                        | Location              | Comparison populations                                                                                                                                       | Exposure duration                                                                                      | Health endpoint                                                  | Effect estimate               | Results                                                                                                                                                                                                                                                                                                                                                                                                                   |
|------------------------------|-----------------------|--------------------------------------------------------------------------------------------------------------------------------------------------------------|--------------------------------------------------------------------------------------------------------|------------------------------------------------------------------|-------------------------------|---------------------------------------------------------------------------------------------------------------------------------------------------------------------------------------------------------------------------------------------------------------------------------------------------------------------------------------------------------------------------------------------------------------------------|
| Wong et al. 2008             | Hong Kong, China      | Neighborhood social deprivation index, based on unemployment, household income, education, number of people in the household, marital status, and subtenancy | Short-term; mean 8-h avg 18.45 ppb (SD 11.5 ppb)                                                       | Total mortality, cardiovascular mortality, respiratory mortality | % increase (95% CI) per 5 ppb | Total mortality: Low deprivation: 0.22 (-0.26, 0.70), Middle deprivation: 0.46 (0.09, 0.83), High deprivation: 0.02 (-0.49, 0.54); Cardiovascular mortality: Low deprivation: 0.41 (-0.53, 1.35), Middle deprivation: 0.65 (-0.04, 1.34), High deprivation: 0.23 (-0.71, 1.18); Respiratory mortality: Low deprivation: 0.46 (-0.68, 1.61), Middle deprivation: 0.26 (-0.56, 1.09), High deprivation: -0.51 (-1.65, 0.64) |
| Stafoggia et al. 2010        | Italy                 | Neighborhood-level low income, medium income, high income                                                                                                    | Short-term; mean 8-h moving avg ranged by city from 38.95 ppb (SD 10.25 ppb) to 57.7 ppb (SD 19.3 ppb) | Mortality                                                        | % increase (95% CI) per 5 ppb | Neighborhood-level low income: 1.9 (0.5, 3.4), Neighborhood-level medium income: 1.7 (0.8, 2.6), Neighborhood-level high income: 2.2 (0.7, 3.9)                                                                                                                                                                                                                                                                           |
| Romieu et al. 2004           | Ciudad Juarez, Mexico | High SES, Medium SES, Low SES; SES measured by social deprivation indexes (based on available public services)                                               | Short-term; annual avg of daily value ranged from 43.43 ppb (SD 19.57 ppb) to 55.12 ppb (SD 20.72 ppb) | Infant mortality                                                 |                               | Quantitative results not given                                                                                                                                                                                                                                                                                                                                                                                            |
| Carbajal-Arroyo et al. 2011  | Mexico City, Mexico   | Area-level neighborhood socioeconomic index, based on variables related to education, income, and housing condition                                          | Short-term; mean 1-h max 103.0 ppb (SD 34.2 ppb)                                                       | Infant mortality (all-cause and respiratory)                     | OR (95% CI) per 69 ppb        | All-cause: Low SES: 1.076 (0.980, 1.182), Medium SES: 1.041 (0.973, 1.113), High SES: 0.932 (0.875, 0.993); Respiratory: Low SES: 1.264 (1.079, 1.481), Medium SES: 0.997 (0.889, 1.119), High SES: 0.983 (0.872, 1.108)                                                                                                                                                                                                  |
| Morello-Frosch et al. (2010) | California            | Neighborhood-level poverty rate: 0-7%, 7-14%, 14-22%, 22-32%, ≥32%                                                                                           | Long-term; daily mean avged over pregnancy 23.5 (SD 6.5 ppb)                                           | Birthweight                                                      |                               | Quantitative results not given; in figure lower birth weights in association with change in ozone were observed in all grps except 0-7%. The change was not linear.                                                                                                                                                                                                                                                       |

| Study                  | Location                        | Comparison populations                                                                                  | Exposure duration                                                                                                                                                                              | Health endpoint                          | Effect estimate         | Results                                                                                                                                                                                                                                                                                                                                                                             |
|------------------------|---------------------------------|---------------------------------------------------------------------------------------------------------|------------------------------------------------------------------------------------------------------------------------------------------------------------------------------------------------|------------------------------------------|-------------------------|-------------------------------------------------------------------------------------------------------------------------------------------------------------------------------------------------------------------------------------------------------------------------------------------------------------------------------------------------------------------------------------|
| Hansen et al. 2008     | Australia                       | Neighborhood socioeconomic index (quartiles), based on income, education, unemployment, and occupations | Long-term; mean 8-hr avg 24.8 ppb (IQR 9.8 ppb)                                                                                                                                                | Fetal ultrasonic abdominal circumference | Mean change per 9.8 ppb | Quartile 1: -2.18 (-5.39, 1.02), Quartile 2: -1.33 (-3.17, 0.50), Quartile 3: -0.94 (-2.33, 0.45), Quartile 4: -1.50 (-2.78, -0.22); Note: change for other fetal measurements (femur length, biparietal diameter, and head circumference) not given because none of the overall associations with ozone were "statistically significant;" therefore, modification was not examined |
| <b>Outdoor workers</b> |                                 |                                                                                                         |                                                                                                                                                                                                |                                          |                         |                                                                                                                                                                                                                                                                                                                                                                                     |
| Tovalin et al. 2006    | Mexico (Mexico City and Puebla) | Outdoor workers, indoor workers                                                                         | Short-term; Mexico City: medians of: 28.5 ppb and 5.1 ppb for outdoor and indoor workers, respectively, Puebla: medians of 36.1 ppb and 19.5 ppb, for outdoor and indoor workers, respectively | DNA damage (Comet assay tail length)     |                         | Mexico City: Correlation for outdoor workers: R=0.42, p (0.06), No correlation for indoor workers (quantitative results not provided); Puebla: No correlation for indoor or outdoor workers (quantitative results not provided)                                                                                                                                                     |

**Table S4.** Results from controlled human exposure studies examining response modifying factors for O<sub>3</sub>-related health effects (listed in order of appearance within each section).

| Study                 | Location | Population/animal model                                                               | Exposure (O <sub>3</sub> concentration [ppm], duration) | Health endpoint                                                                                                | Results                                                                                                                                                                                                                                                                                                                                                                                                                                           |
|-----------------------|----------|---------------------------------------------------------------------------------------|---------------------------------------------------------|----------------------------------------------------------------------------------------------------------------|---------------------------------------------------------------------------------------------------------------------------------------------------------------------------------------------------------------------------------------------------------------------------------------------------------------------------------------------------------------------------------------------------------------------------------------------------|
| <b>Lifestage</b>      |          |                                                                                       |                                                         |                                                                                                                |                                                                                                                                                                                                                                                                                                                                                                                                                                                   |
| McDonnell et al. 1999 | NC, USA  | Adults, M, 18-35 years, healthy                                                       | 0.0, 0.12, 0.18, 0.24, 0.30, or 0.40 ppm, 2 h           | Respiratory symptoms, FEV <sub>1</sub>                                                                         | Maximum response (i.e., FEV <sub>1</sub> and symptoms, except cough) is inversely related to age                                                                                                                                                                                                                                                                                                                                                  |
| <b>Sex</b>            |          |                                                                                       |                                                         |                                                                                                                |                                                                                                                                                                                                                                                                                                                                                                                                                                                   |
| Bush et al. 1996      | PA, USA  | Adults, M/F, 22-35 years old                                                          | 20 mL bolus of 3 ppm                                    | Bolus penetration, respiratory anatomy (FVC, V <sub>D</sub> , TLC)                                             | O <sub>3</sub> penetration was deeper in women than men; however, when normalized to anatomical dead space no difference was observed.                                                                                                                                                                                                                                                                                                            |
| Hazucha et al. 2003   | NC, USA  | Adults, M/F, 18-60 years old                                                          | 0.42 ppm, 1.5 h                                         | FEV <sub>1</sub>                                                                                               | No significant difference between males and females                                                                                                                                                                                                                                                                                                                                                                                               |
| <b>Asthma</b>         |          |                                                                                       |                                                         |                                                                                                                |                                                                                                                                                                                                                                                                                                                                                                                                                                                   |
| Horstman et al. 1995  | NC, USA  | Adults, M/F, 18-35 years old, asthmatics and nonasthmatics                            | 0.16 ppm, 7.6 h                                         | FEV <sub>1</sub> , FVC, respiratory symptoms, bronchodilator use                                               | Asthmatics had greater decrements in FEV <sub>1</sub> and FEV <sub>1</sub> /FVC but not FVC compared to nonasthmatics. Asthmatics had greater wheezing than nonasthmatics.                                                                                                                                                                                                                                                                        |
| Kreit et al. 1989     | MI, USA  | Adults, M/F, 18-34 years old, asthmatics and nonasthmatics                            | 0.4 ppm, 2 h                                            | FEV <sub>1</sub> , FVC, FEF <sub>25-75</sub> , FEV <sub>1</sub> %, sRaw, respiratory symptoms                  | Greater percent decrease in FEV <sub>1</sub> , FEV <sub>1</sub> %, and FEF <sub>25-75</sub> in asthmatics. No difference between asthmatics and nonasthmatics on FVC and symptoms.                                                                                                                                                                                                                                                                |
| Alexis et al. 2000    | Canada   | Adults, M/F, 18-34 years old, asthmatics and nonasthmatics                            | 0.4 ppm, 2 h                                            | FEV <sub>1</sub> , FVC, FEF <sub>25</sub> , FEF <sub>50</sub> , FEF <sub>75</sub> , prostaglandin F2- $\alpha$ | Similar decrements in FVC and FEV <sub>1</sub> in asthmatics and nonasthmatics. Asthmatics had greater decrement in FEF <sub>75</sub> (small airway function). Indomethacin attenuated O <sub>3</sub> -induced decrements in FVC, FEV <sub>1</sub> in nonasthmatics but not asthmatics and FEF <sub>60p</sub> and FEF <sub>75</sub> in asthmatics but not nonasthmatics. Higher PGF2- $\alpha$ levels in asthmatics post O <sub>3</sub> exposure. |
| Jorres et al. 1996    | Germany  | Adults, M/F, allergic asthmatics, allergic rhinitis without asthma, and nonasthmatics | 0.25 ppm, 3 h                                           | FEV <sub>1</sub> , methacholine and allergen responsiveness                                                    | Mean O <sub>3</sub> -induced FEV <sub>1</sub> decrements not different between asthma, rhinitis, and healthy. Methacholine and allergen responsiveness increased in asthmatics, smaller shift in rhinitis, no change in healthy.                                                                                                                                                                                                                  |

| Study                 | Location | Population/animal model                                              | Exposure (O <sub>3</sub> concentration [ppm], duration) | Health endpoint                                                                                                        | Results                                                                                                                                                                                                                                                                                                                                                                                                                                           |
|-----------------------|----------|----------------------------------------------------------------------|---------------------------------------------------------|------------------------------------------------------------------------------------------------------------------------|---------------------------------------------------------------------------------------------------------------------------------------------------------------------------------------------------------------------------------------------------------------------------------------------------------------------------------------------------------------------------------------------------------------------------------------------------|
| Mudway et al. 2001    | Sweden   | Adults, M/F, median 25 years old, mild atopic asthmatics and healthy | 0.2 ppm, 2 h                                            | Respiratory symptoms, FEV <sub>1</sub> , FVC, bronchial wash and BALF protein, neutrophils, albumin, and antioxidants, | No change in the O <sub>3</sub> -induced FEV <sub>1</sub> decrement and BALF or BW neutrophils, albumin or protein between healthy and asthmatic subjects. O <sub>3</sub> decreased BW and BALF ascorbate and increased GSSG in healthy subjects but not asthmatics, which had lower and higher baseline levels, respectively. O <sub>3</sub> increased EC-SOD in healthy subjects. No O <sub>3</sub> effect on MDA, urate, $\alpha$ -tocopherol. |
| Basha et al. 1994     | MI, USA  | Adults, M, 18-45 years old, healthy and asthmatic                    | 0.2 ppm, 6 h                                            | Respiratory symptoms, sRaw, FVC, IC, FEV <sub>1</sub> , FEF, BALF albumin, cytokines, cell count                       | No difference in lung function between groups. Increased PMNs, IL-6, and IL-8 in asthmatics compared to healthy.                                                                                                                                                                                                                                                                                                                                  |
| Peden et al. 1997     | NC, USA  | Adults, M, mild asthmatics                                           | 0.16 ppm, 7.6 h                                         | BALF eosinophils, lung function (FEV <sub>1</sub> , FVC)                                                               | Increased eosinophils and PMN's after O <sub>3</sub> exposure more in initial (bronchial) fraction. No correlation of eosinophils and PMN's, FEV <sub>1</sub> and FVC decreased 14% and 9%, respectively.                                                                                                                                                                                                                                         |
| Scannell et al. 1996  | CA, USA  | Adults, M/F, 26 $\pm$ 5.4 years old, mild asthmatics                 | 0.2 ppm, 4 h                                            | Lung function (FEV <sub>1</sub> , FVC), BALF cell counts                                                               | FVC, FEV <sub>1</sub> decreased 17.6% and 25% respectively. Spirometry changes in asthmatics similar to healthy subjects (Aris et al., 1995; Balmes et al., 1997). Trend for larger increase in SRaw in asthmatics. Larger increase in PMN's and protein in asthmatics indicating more inflammation. No increase in eosinophils.                                                                                                                  |
| Hernandez et al. 2010 | NC, USA  | Adults, M/F, 19-39 years old, healthy, atopic, and atopic asthmatics | 0.4 ppm, 2 h                                            | Lung function, sputum cytokines, leukocyte cell-surface molecules, and hyaluronic acid                                 | Similar decrements in lung function in all groups. Increased sputum neutrophil and IL-8 and HA in asthmatics and atopics. Asthmatics had increased sputum IL-6 and IL-1 $\beta$ and airway TLR4, CD23, Fc $\epsilon$ RI.                                                                                                                                                                                                                          |
| Bosson et al. 2003    | Sweden   | Adults, M/F, 19-48 years old, healthy and mild asthmatic             | 0.2 ppm, 2 h                                            | Endobronchial mucosal biopsy, cell markers, cytokines, and adhesion molecules expression                               | Significantly higher baseline expression of IL-4 and IL-5 in bronchial mucosal biopsies from asthmatic vs. healthy subjects 6 h postexposure. Following O <sub>3</sub> exposure, epithelial expression of IL-5, GM-CSF, ENA-78, and IL-8 increased significantly in asthmatics, as compared to healthy subjects.                                                                                                                                  |

| Study                 | Location | Population/animal model                                                                                   | Exposure (O <sub>3</sub> concentration [ppm], duration)                                                                                               | Health endpoint                                                            | Results                                                                                                                                                                                           |
|-----------------------|----------|-----------------------------------------------------------------------------------------------------------|-------------------------------------------------------------------------------------------------------------------------------------------------------|----------------------------------------------------------------------------|---------------------------------------------------------------------------------------------------------------------------------------------------------------------------------------------------|
| <b>Obesity</b>        |          |                                                                                                           |                                                                                                                                                       |                                                                            |                                                                                                                                                                                                   |
| McDonnell et al. 2010 | NC, USA  | Adults, M/F, age 18-35 years, data from 15 controlled human exposure studies conducted at US EPA facility | 0.08-0.4 ppm, 1-7.6 h, from 1981-1992                                                                                                                 | Model predicted FEV <sub>1</sub> response                                  | Increasing BMI associated with increasing magnitude of FEV <sub>1</sub> response to ozone (estimated BMI coefficient statistically signif different from zero, 0.4855 [0.1018, 0.8693])           |
| Bennett et al. 2007   | NC, USA  | Adults, M/F, age 18-35 years,                                                                             | 0.42 ppm, 1.5 h, with IE                                                                                                                              | Spirometry (FEV <sub>1</sub> , FVC, FEF <sub>25-75</sub> )                 | Change in FEV <sub>1</sub> after ozone was inversely correlated with BMI (r = -0.016). More obviously in females, not statistically signif in males. Similar for change in FEF <sub>25-75</sub> . |
| <b>Diet</b>           |          |                                                                                                           |                                                                                                                                                       |                                                                            |                                                                                                                                                                                                   |
| Samet et al. 2001     | NC, USA  | Adults, 18-35 years (mean 26 years), M/F                                                                  | 0.4 ppm, 2 h, following 2 week antioxidant supplementation or not (vitamin C, vitamin E, vegetable cocktail)                                          | Pulmonary function, BALF cellularity and cytokines                         | Antioxidant supplementation blunted the O <sub>3</sub> -induced decrement in and FVC. No change in O <sub>3</sub> -induced respiratory symptoms or BALF PMN and BALF IL-6 increases.              |
| Trenga et al. 2001    | WA, USA  | Adults with asthma, mean 27 years, M/F                                                                    | 0.12 ppm, 45 min, challenged with 0.1 and 0.25 ppm SO <sub>2</sub> for 10 min, supplemented or not with vitamins (vitamins E and C) for 4 weeks prior | SO <sub>2</sub> induced bronchial hyperresponsiveness, pulmonary function, | Antioxidant supplementation led to less severe responses to SO <sub>2</sub> challenge. FEV <sub>1</sub> : -1.2% vs -4.3%; peak flow: 2.2% vs -3.0%; mid-forced expiratory flow 2% vs -4.3%        |
| <b>SES</b>            |          |                                                                                                           |                                                                                                                                                       |                                                                            |                                                                                                                                                                                                   |
| Seal et al. 1996      | NC, USA  | Adults, M/F, 18-35 years old (mean 23.9 ±4.4 years)                                                       | 0, 0.12, 0.18, 0.24, 0.3, or 0.4 ppm, 2.3 h                                                                                                           | Pulmonary function (FEV <sub>1</sub> )                                     | Individuals from a medium SES (education of father) most responsive to O <sub>3</sub> induced FEV <sub>1</sub> decrements, followed by low and high SES.                                          |

| Study                    | Location | Population/animal model                | Exposure (O <sub>3</sub> concentration [ppm], duration)                                         | Health endpoint                                                                                                                                                                                                                                                                                                                                                                                                                                                            | Results                                                                                                                                                                                                                                                                                                                          |
|--------------------------|----------|----------------------------------------|-------------------------------------------------------------------------------------------------|----------------------------------------------------------------------------------------------------------------------------------------------------------------------------------------------------------------------------------------------------------------------------------------------------------------------------------------------------------------------------------------------------------------------------------------------------------------------------|----------------------------------------------------------------------------------------------------------------------------------------------------------------------------------------------------------------------------------------------------------------------------------------------------------------------------------|
| <b>Outdoor Workers</b>   |          |                                        |                                                                                                 |                                                                                                                                                                                                                                                                                                                                                                                                                                                                            |                                                                                                                                                                                                                                                                                                                                  |
| Hu et al. 1994           | PA, USA  | Adults, M, mean 32.3±6.7 years old     | 10 ml bolus of 3.0 ppm O <sub>3</sub> at respiratory flows of 150, 250, 500, 750, and 1000 ml/s | Absorbed fraction (amount of O <sub>3</sub> absorbed during a single respiratory cycle relative to inhaled amount), penetration volume (mean airway volume that would be reached by O <sub>3</sub> molecules during inhalation if no absorption occurred), V <sub>b</sub> (breakthrough volume, mean airway volume traversed by unabsorbed O <sub>3</sub> molecules during expiration), dispersion (measure of longitudinal mixing of unabsorbed O <sub>3</sub> molecules) | At a fixed flow, absorbed fraction increased with penetration volume and elevating flow rate shifted the absorbed fraction distribution distally into the lungs so a greater amount of O <sub>3</sub> reached the small airways and air spaces and less O <sub>3</sub> was absorbed in the upper airways and conducting airways. |
| Nodelman and Ultman 1999 | PA, USA  | Adults, M/F, mean 24.7 ± 5.4 years old | 20 ml bolus of 1.0 ppm O <sub>3</sub> at respiratory flows of 150, 250, and 1000 ml/s           | Absorbed fraction (amount of O <sub>3</sub> absorbed during a single respiratory cycle relative to inhaled amount), penetration volume (mean airway volume that would be reached by O <sub>3</sub> molecules during inhalation if no absorption occurred)                                                                                                                                                                                                                  | Larger penetrations of O <sub>3</sub> beyond the upper airways occurred as flow increased and during nasal than during oral breathing                                                                                                                                                                                            |



**Table S5.** Results from toxicological studies examining response modifying factors for O<sub>3</sub>-related health effects (listed in order of appearance within each section).

| Study                | Location | Population/animal model                          | Exposure (O <sub>3</sub> concentration [ppm], duration)                                                | Health endpoint                                                     | Results                                                                                                                                                                                                                                                                                                                                                                  |
|----------------------|----------|--------------------------------------------------|--------------------------------------------------------------------------------------------------------|---------------------------------------------------------------------|--------------------------------------------------------------------------------------------------------------------------------------------------------------------------------------------------------------------------------------------------------------------------------------------------------------------------------------------------------------------------|
| <b>Lifestage</b>     |          |                                                  |                                                                                                        |                                                                     |                                                                                                                                                                                                                                                                                                                                                                          |
| Fanucchi et al. 2006 | CA, USA  | Monkey ( <i>Macaca mulatta</i> ), M, 30 days     | 0.5 ppm, 8 h/day for 5 days followed by 9 days of filtered air, 5 months of episodic exposure          | Lung morphology and structure, lung function                        | Fewer nonalveolarized airway generations, reduction of distal airway size, hyperplastic bronchiolar epithelium, altered smooth muscle bundle orientation in terminal and respiratory bronchioles                                                                                                                                                                         |
| Carey et al. 2007    | CA, USA  | Monkey ( <i>Macaca mulatta</i> ), M, 30 days     | 0.5 ppm, 8 h/day for 5 days followed by 9 days of filtered air, 5 days or 70 days of episodic exposure | Nasal airway histopathology, imaging, and modeling                  | Neutrophilic rhinitis, necrosis and exfoliation of epithelium lining of the anterior maxilloturbinate                                                                                                                                                                                                                                                                    |
| Harkema et al. 1987  | CA, USA  | Monkey ( <i>Macaca radiata</i> ), M/F, 2-6 years | 0.15 or 0.3 ppm, 8 h/day for 6 or 90 days                                                              | Nasal airway histopathology                                         | Ciliated cell necrosis, shortened cilia, secretory cell hyperplasia, ultrastructural goblet cell changes (90 days), inflammatory cell influx (6 days)                                                                                                                                                                                                                    |
| Plopper et al. 2007  | CA, USA  | Monkey ( <i>Macaca mulatta</i> ), M, 30 days     | 0.5 ppm, 8 h/day for 5 days followed by 9 days of filtered air, 5 months of episodic exposure          | Lung morphology and structure, lung function, immunologic responses | Increased BALF eosinophils, decreased number of conducting airway generations, reduced airway diameter and length growth, bronchial epithelium hyperplasia, reorganization of the airway vascular and immune system, modified epithelial nerve fiber distribution, altered distal airway smooth muscle bundle orientation and abundance, increase in mucous goblet cells |
| López et al. 2008    | Mexico   | Rats (Wistar), F, pregnant                       | 1 ppm, 12 h/day, 18, 20, and 21 days of gestation                                                      | Ultrastructural analysis                                            | GD18: swollen mitochondria, cytoplasmic vacuolization, structural architecture disarrangement, cytoplasm rupture GD20: flake-off epithelial cells and luminal lamina bodies GD21: edematous mitochondria, mitochondria cristae damage                                                                                                                                    |
| Auten et al. 2009    | NC, USA  | Mice (C57BL6), dams and litters                  | 1 ppm, 3 h/day, every other day, 3 times a week, 4 weeks                                               | Airway responsiveness, inflammatory markers, lung morphometry       | Increased maternal whole lung cytokines (IL-1β, TNFα, IL-6, KC, MCP-1), increased airway hyperresponsiveness (total and large airway resistance)                                                                                                                                                                                                                         |

| Study                      | Location | Population/animal model                                                                                                                                                         | Exposure (O <sub>3</sub> concentration [ppm], duration)                       | Health endpoint                                                                                                                                                                 | Results                                                                                                                                                                                                                                                                                                                                                    |
|----------------------------|----------|---------------------------------------------------------------------------------------------------------------------------------------------------------------------------------|-------------------------------------------------------------------------------|---------------------------------------------------------------------------------------------------------------------------------------------------------------------------------|------------------------------------------------------------------------------------------------------------------------------------------------------------------------------------------------------------------------------------------------------------------------------------------------------------------------------------------------------------|
| Vancza et al. 2009         | NY, USA  | Mice (A/J, AKR/K, C3H/HeJ, BALB/cJ, C57BL/6J, DBA/J, SJL/J, 129x1/SvJ), neonatal (15-16 days old), lactating and non-lactating female (15 weeks old), adult male (15 weeks old) | 0.8 ppm, 5 h                                                                  | Lung inflammation (PMN) and injury (protein) (BALF) 24-h postexposure                                                                                                           | Neonates had increased protein compared to adults in two strains. Adults had increased protein compared to neonates in three strains. Neonates had increased PMN compared to adults in two strains. Adults had increased PMNs in one strain. Significant interaction between age and total PMNs and strain:exposure: age for total protein and total PMNs. |
| Bils 1970                  | CA, USA  | Mice (IVAN-NMRI), 4 days, 1 month, 2 months old                                                                                                                                 | 0.6-1.3 ppm, 6-7 h/day, 1-2 days                                              | Lung morphology                                                                                                                                                                 | Youngest mice were most sensitive to alveolar damage with endothelial cells lining the capillaries as a main target.                                                                                                                                                                                                                                       |
| Servais et al. 2005        | France   | Rats (Sprague-Dawley), M, 3 weeks (young), 6 months (adult), and 20 months (aged) old                                                                                           | 0.5 ppm, 12 h/day, 7 days                                                     | Ventilation, pulmonary mitochondria respiration and H <sub>2</sub> O <sub>2</sub> release, pulmonary antioxidant enzyme activity, DNA 8-oxodG and HNE-dG content, HSP72 content | Young rats had higher nDNA 8-oxodG and HSP72 content than adult rats. Aged rats had mild uncoupled lung mitochondria, increased SOD and GPx activities and higher 8-oxodG content than adult rats.                                                                                                                                                         |
| Fortino et al. 2007        | Italy    | Mice (SKH-1 hairless mice), F, 8 weeks and 18 months old                                                                                                                        | 0.25 ppm, 6 h/day, 4 days                                                     | Cutaneous MMP protein and activity                                                                                                                                              | Increased MMP-2 in young but not old mice; no change in MMP-9. Increased MMP-12 in older mice.                                                                                                                                                                                                                                                             |
| Hamade and Tankersley 2009 | MD, USA  | Mice (C57Bl/6J, C3H/HeJ, and C3H/HeOuj), M, 18-20 weeks                                                                                                                         | 0.6 ppm, 2 h/day, 3 days, followed by 536 µg/m <sup>3</sup> carbon black, 3 h | Heart rate, heart rate variability, respiratory responses (respiratory rate, tidal volume, ventilation), core temperature                                                       | Strains varied in integration of the cardiac and respiratory systems, implications in interindividual variability. B6 mice were mildly responsive with rapid adaptation, whereas C3 mice were highly responsive with adaptation only in HeJ mice with regards to changes in cardiac and respiratory responses.                                             |
| Tankersley et al. 2010     | MD, USA  | Mice (C57Bl/6J, 129S1/SvImJ), M/F, 5 or 18 months                                                                                                                               | 0.6 ppm, 2 h, followed by 556 µg/m <sup>3</sup> carbon black, 3 h             | Echocardiographic and in vivo hemodynamic measurements (e.g., HR; PWTEd, posterior wall thickness at end-diastole; LVESD, left ventricular diameter at end systole)             | Significant interaction between age and strain on HR and PWTEd, which implies that aging affects the HR and function in response to O <sub>3</sub> differently between mouse strains.                                                                                                                                                                      |

| Study                       | Location | Population/animal model                                                                                                                                                        | Exposure (O <sub>3</sub> concentration [ppm], duration)                                       | Health endpoint                                                                   | Results                                                                                                                                                                                                                                                                                                                                                     |
|-----------------------------|----------|--------------------------------------------------------------------------------------------------------------------------------------------------------------------------------|-----------------------------------------------------------------------------------------------|-----------------------------------------------------------------------------------|-------------------------------------------------------------------------------------------------------------------------------------------------------------------------------------------------------------------------------------------------------------------------------------------------------------------------------------------------------------|
| Hamade et al. 2010          | MD, USA  | Mice (C57Bl/6J, C3H/HeJ, and C3H/HeOuj), M, 5 or 12 months                                                                                                                     | 0.6 ppm, 2 h, followed by 536 µg/m <sup>3</sup> carbon black, 3 h                             | Heart rate, heart rate variability, breathing, core temperature                   | Aged mice exhibited attenuated changes in cardiopulmonary physiology after O <sub>3</sub> exposure. Genetic differences between mice strains could be altering formation of ROS, which tends to increase with age, thus modulating O <sub>3</sub> induced effects.                                                                                          |
| Lim et al. 2006             | CA, USA  | Mice (SKH-1 hairless mice), F, 8 weeks and 18 months old                                                                                                                       | 0.5 ppm, 6 h/day, 9 days                                                                      | Wound closure, lipid peroxidation, protein oxidation, transcription factor levels | Older mice had delayed wound closure, increased 4-HNE protein adducts and protein carbonyls, decreased p-IkBα and TGFβ protein.                                                                                                                                                                                                                             |
| Rivas-Arancibia et al. 2000 | Mexico   | Rats (Wistar), M, 47 days (young), 540 days (adult), 900 days (aged) old                                                                                                       | 0.7-1.0 ppm, 4 h                                                                              | Motor activity, one-trial passive avoidance conditioning, lipid peroxidation      | Young and aged rats had decreased short-term and long-term memory, not adult rats. Lipid peroxidation increased in young and aged rats in the striatum, hippocampus, and frontal cortex. Lipid peroxidation increased in young rats cerebellum.                                                                                                             |
| <b>Sex</b>                  |          |                                                                                                                                                                                |                                                                                               |                                                                                   |                                                                                                                                                                                                                                                                                                                                                             |
| Vancza et al. 2009          | NY, USA  | Mice (A/J, AKR/K, C3H/HeJ, BALB/cJ, C57BL/6J, DBA/J, SJL/J, 129x1/SvJ), neonatal (15-16 days old), lactating and nonlactating female (15 weeks old), adult male (15 weeks old) | 0.8 ppm, 5 h                                                                                  | Lung inflammation and injury (BALF) 24-h postexposure                             | Nonlactating females had larger increases in protein compared to males in most strains (6 of 8) and largest increase in PMN in one strain. Lactating females had the largest increase in protein in 6 of 8 strains (2 statistically signif) and largest increase in PMN in 3 of 8 (1 statist signif). Signif interactions between exposure:sex for protein. |
| <b>Asthma</b>               |          |                                                                                                                                                                                |                                                                                               |                                                                                   |                                                                                                                                                                                                                                                                                                                                                             |
| Fanucchi et al. 2006        | CA, USA  | Monkey ( <i>Macaca mulatta</i> ), M, 30 days                                                                                                                                   | 0.5 ppm, 8 h/day for 5 days followed by 9 days of filtered air, 5 months of episodic exposure | Lung morphology and structure, lung function                                      | Fewer nonalveolarized airway generations, reduction of distal airway size, hyperplastic bronchiolar epithelium, altered smooth muscle bundle orientation in terminal and respiratory bronchioles                                                                                                                                                            |

| Study                 | Location | Population/animal model                      | Exposure (O <sub>3</sub> concentration [ppm], duration)                                                                                                            | Health endpoint                                                                                                                             | Results                                                                                                                                                                                                                                                                                    |
|-----------------------|----------|----------------------------------------------|--------------------------------------------------------------------------------------------------------------------------------------------------------------------|---------------------------------------------------------------------------------------------------------------------------------------------|--------------------------------------------------------------------------------------------------------------------------------------------------------------------------------------------------------------------------------------------------------------------------------------------|
| Joad et al. 2006      | CA, USA  | Monkey ( <i>Macaca mulatta</i> ), M, 30 days | 0.5 ppm and 0.5 ppm+house dust mite allergen (2 h/day, last 3 days of ozone), 6 h/day for 5 days followed by 9 days of filtered air, 5 months of episodic exposure | Methacholine airway responsiveness, lung histology                                                                                          | Ozone+HDMA increased respiratory bronchiole airway responsiveness compared to FA, ozone, or allergen alone.                                                                                                                                                                                |
| Schelegle et al. 2003 | CA, USA  | Monkey ( <i>Macaca mulatta</i> ), M, 30 days | 0.5 ppm and 0.5 ppm+house dust mite allergen (2 h/day, last 3 days of ozone), 8 h/day for 5 days followed by 9 days of filtered air, 5 months of episodic exposure | Pulmonary mechanics, airway responsiveness, plasma histamine, BALF cell counts, serum IgE, histopathology                                   | Ozone+HDMA increased serum IgE, serum histamine, baseline airway resistance (R <sub>aw</sub> ), airway responsiveness (EC150R <sub>aw</sub> ), and airways eosinophilia. Also, combined exposure resulted in greater alterations in airway structure and content than ozone or HDMA alone. |
| Funabashi et al. 2004 | Japan    | Mice (C57BL/6), M                            | 1.0 ppm with or without exposure to ovalbumin (30 min, 3 times), 6 h/day, 5 days/week for 5 weeks                                                                  | Pulmonary function                                                                                                                          | With OA sensitization, O <sub>3</sub> increased respiratory resistance and decreased dynamic compliance                                                                                                                                                                                    |
| Funabashi et al. 2004 | Japan    | Mice (C57BL/6), M                            | 1.0 ppm, 1 h following repeated exposure                                                                                                                           | Pulmonary function, arterial blood gas, histopathology                                                                                      | No change in PaO <sub>2</sub> after O <sub>3</sub> , alveolar epithelial hyperplasia after O <sub>3</sub> , perivascular infiltration of eosinophils and histiocytes with alveolar epithelial hyperplasia after O <sub>3</sub> +OA                                                         |
| Wagner et al. 2007    | MI, USA  | Rat (Brown Norway), M                        | 1.0 ppm with or without exposure to ovalbumin (days 1 and 2), 8 h/day, days 4 and 5, and γ-tocopherol on days 2-5                                                  | BALF cellularity, cytokine content, leukotriene content, tocopherols, intraepithelial mucosubstances morphometry, tissue eosinophil density | Ozone exposure of allergic rats enhanced intraepithelial mucosubstances increases in proximal axial airways (200%), induced cys-leukotrienes, MCP-1, and IL-6 production in BALF, and upregulated expression of IL-5 and IL-13 mRNA. Attenuated by γ-T treatment.                          |

| Study                | Location | Population/animal model                                                                                                                                                                    | Exposure (O <sub>3</sub> concentration [ppm], duration)                                                                   | Health endpoint                                                                                                                             | Results                                                                                                                                                                                                                                                                                                                                                                                                                                                                                                                                                          |
|----------------------|----------|--------------------------------------------------------------------------------------------------------------------------------------------------------------------------------------------|---------------------------------------------------------------------------------------------------------------------------|---------------------------------------------------------------------------------------------------------------------------------------------|------------------------------------------------------------------------------------------------------------------------------------------------------------------------------------------------------------------------------------------------------------------------------------------------------------------------------------------------------------------------------------------------------------------------------------------------------------------------------------------------------------------------------------------------------------------|
| Oyarzún et al. 2005  | Chile    | Rat (Sprague Dawley)                                                                                                                                                                       | 0.25 ppm, 4 h/day, 5 days/week, for 5 and 60 days, 30 days after bleomycin instillation                                   | Histopathology                                                                                                                              | No change in lung damage after 60 days compared to bleomycin alone. Increased mean score of pulmonary inflammation and fibrosis after 5 days of ozone. Increased frequency of bronchopneumonia and detachment of bronchiolar epithelium after 5 days of ozone.                                                                                                                                                                                                                                                                                                   |
| <b>Obesity</b>       |          |                                                                                                                                                                                            |                                                                                                                           |                                                                                                                                             |                                                                                                                                                                                                                                                                                                                                                                                                                                                                                                                                                                  |
| Johnston et al. 2008 | MA, USA  | Mice (C57BL/6J, diet-induced obesity [C57BL/6J 60% calories from fat vs. 10%]), M/F                                                                                                        | 2 ppm, 3 h                                                                                                                | Pulmonary mechanics, BALF cellularity and cytokines                                                                                         | Obesity increased O <sub>3</sub> -induced BALF protein (hyperpermeability marker), IL-6, Eotaxin, KC, MIP-2, IP-10, sTNFR1, sTNFR2, over lean O <sub>3</sub> exposure.                                                                                                                                                                                                                                                                                                                                                                                           |
| Shore et al. 2009    | MA, USA  | Mice (C57BL/6J, <i>Db/db</i> , <i>Cpe<sup>fat</sup></i> , diet-induced obesity [C57/IL6 <sup>-/-</sup> 60% calories from fat vs. 10%]), <i>F (Db/db) M/F (Cpe<sup>fat</sup>, C57BL/6J)</i> | 0.3 ppm, 12-72 h                                                                                                          | Pulmonary mechanics, BALF cellularity and cytokines, serum cytokines                                                                        | Obesity (genetic and diet induced) blunted the subacute (72 h) O <sub>3</sub> -induced decrease in Cdyn, increase in BALF macrophages and neutrophils, increase in BALF protein, and increase in BALF sTNFR1. IL-6 deficiency attenuated O <sub>3</sub> induced increase in BALF macrophages and neutrophils. Obesity related difference in O <sub>3</sub> induced neutrophil influx was dependent on IL-6. Discordance with acute exposure, obesity increased acute (12-48 h) O <sub>3</sub> induced increased BALF protein, BALF macrophages, and BALF sTNFR1. |
| <b>Diet</b>          |          |                                                                                                                                                                                            |                                                                                                                           |                                                                                                                                             |                                                                                                                                                                                                                                                                                                                                                                                                                                                                                                                                                                  |
| Wagner et al. 2007   | MI, USA  | Rat (Brown Norway), M                                                                                                                                                                      | 1.0 ppm with or without exposure to ovalbumin (days 1 and 2), 8 h/day, days 4 and 5, and $\gamma$ -tocopherol on days 2-5 | BALF cellularity, cytokine content, leukotriene content, tocopherols, intraepithelial mucosubstances morphometry, tissue eosinophil density | Ozone exposure of allergic rats enhanced intraepithelial mucosubstances increases in proximal axial airways (200%), induced cys-leukotrienes, MCP-1, and IL-6 production in BALF, and upregulated expression of IL-5 and IL-13 mRNA. Attenuated by $\gamma$ -T treatment.                                                                                                                                                                                                                                                                                        |
| Wagner et al. 2009   | MI, USA  | Rat (Brown Norway), M                                                                                                                                                                      | 1.0 ppm with or without exposure to ovalbumin (days 1 and 2), 8 h/day, days 4 and 5, and $\gamma$ -tocopherol on days 2-5 | Nasal histology, morphology of intraepithelial mucosubstances, eosinophilic inflammation, mucin glycoprotein 5AC expression                 | $\gamma$ -tocopherol attenuated ozone+OVA increases in intraepithelial mucosubstances, mucosal eosinophils in nasal and paranasal airways, and MUC5AC expression.                                                                                                                                                                                                                                                                                                                                                                                                |

| Study                 | Location | Population/animal model          | Exposure (O <sub>3</sub> concentration [ppm], duration)                                                                                                                                                                                                                  | Health endpoint                                                                                                  | Results                                                                                                                                                                                                                                                                                                                |
|-----------------------|----------|----------------------------------|--------------------------------------------------------------------------------------------------------------------------------------------------------------------------------------------------------------------------------------------------------------------------|------------------------------------------------------------------------------------------------------------------|------------------------------------------------------------------------------------------------------------------------------------------------------------------------------------------------------------------------------------------------------------------------------------------------------------------------|
| Chhabra et al. 2010   | India    | Guinea pigs (Hartley), M         | 0.12 ppm, 2 h/day, 4 weeks, sensitized with ovalbumin, with or without vitamin supplementation (vitamin C and E)                                                                                                                                                         | Airway responsiveness to inhaled histamine (Sgaw, AHR), BALF measures of antioxidant status and oxidative stress | Antioxidant supplementation attenuated O <sub>3</sub> -induced increase in AHR and early and late bronchoconstrictive responses after OVA, increased BALF superoxide, increased plasma MDA, decreased red cell SOD activity.                                                                                           |
| Kodavanti et al. 1995 | NC, USA  | Guinea pigs (Hartley), F         | 0, 0.2, 0.4, and 0.8 ppm, 23 h/day, 7 days, dietary deficiency in ascorbate 1 week prior, during, and 1 week post exposure                                                                                                                                               | BALF cellularity, protein, albumin, antioxidants                                                                 | Ozone (0.8 ppm) increased BALF protein and albumin and ascorbate deficiency did not change the response. Ascorbate deficiency increased the O <sub>3</sub> -induced BALF cells and neutrophils (0.8 ppm). Ozone increased lung and BALF ascorbate, glutathione, and uric acid. No change in lung $\alpha$ -tocopherol. |
| Valacchi et al. 2009  | CA, USA  | Mice (SKH-1 hairless mice)       | 0.8 ppm, 6 h/day, 7 days, supplemented diet with $\beta$ -carotene for 1 month prior                                                                                                                                                                                     | Proinflammatory markers expression (TNF $\alpha$ , MIP2, HO-1, iNOS) in skin tissue                              | O <sub>3</sub> increased mRNA expression of TNF $\alpha$ , MIP2, iNOS and HO-1 protein. $\beta$ -carotene supplementation protected against these increases.                                                                                                                                                           |
| Paquette et al. 1996  | MD, USA  | Mice (C57BL/6J and C3H/HeJ), M/F | 0.3 ppm, 48 and 72 h; pregnant dams fed vitamin A sufficient or deficient diets, litters fed same diet until 6-8 weeks old, then O <sub>3</sub> exposure; group of vitamin A deficient mice were supplemented with vitamin A for 5 days prior to O <sub>3</sub> exposure | BALF cellularity and protein                                                                                     | Increased BALF protein and epithelial cells after O <sub>3</sub> exposure in vitA deficient mice compared to sufficient mice in both strains. O <sub>3</sub> -induced PMN and macrophage infiltration was increased in vitA deficient C3 mice compared to sufficient, not in B6.                                       |

## References

- Alexeeff SE, Litonjua AA, Suh H, Sparrow D, Vokonas PS, Schwartz J. 2007. Ozone exposure and lung function: Effect modified by obesity and airways hyperresponsiveness in the van normative aging study. *Chest* 132:1890-1897.
- Alexis N, Urch B, Tarlo S, Corey P, Pengelly D, O'Byrne P, et al. 2000. Cyclooxygenase metabolites play a different role in ozone-induced pulmonary function decline in asthmatics compared to normals. *Inhal Toxicol* 12:1205-1224.
- Arbex AM, de Souza Conceicao GM, Perez Cendon S, Arbex FF, Lopes AC, Providello Moyses E, et al. 2009. Urban air pollution and copd-related emergency room visits. *J Epidemiol Community Health* 966:777-783.
- Auten RL, Potts EN, Mason SN, Fischer B, Huang Y, Foster WM. 2009. Maternal exposure to particulate matter increases postnatal ozone-induced airway hyperreactivity in juvenile mice. *Am J Respir Crit Care Med* 180:1218-1226.
- Barraza-Villarreal A, Sunyer J, Hernandez-Cadena L, Escamilla-Nunez MC, Sienra-Monge JJ, Ramirez-Aguilar M, et al. 2008. Air pollution, airway inflammation, and lung function in a cohort study of mexico city schoolchildren. *Environ Health Perspect* 116:832-838.
- Basha MA, Gross KB, Gwizdala CJ, Haidar AH, Popovich J, Jr. 1994. Bronchoalveolar lavage neutrophilia in asthmatic and healthy volunteers after controlled exposure to ozone and filtered purified air. *Chest* 106:1757-1765.
- Bell ML, Dominici F. 2008. Effect modification by community characteristics on the short-term effects of ozone exposure and mortality in 98 us communities. *Am J Epidemiol* 167:986-997.
- Bennett WD, Hazucha MJ, Folinsbee LJ, Bromberg PA, Kissling GE, London SJ. 2007. Acute pulmonary function response to ozone in young adults as a function of body mass index. *Inhal Toxicol* 19:1147-1154.
- Berhane K, Zhang Y, Linn WS, Rappaport EB, Bastain TM, Salam MT, et al. 2011. The effect of ambient air pollution on exhaled nitric oxide in the children's health study. *Eur Respir J* 37:1029-1036.
- Bils RF. 1970. Ultrastructural alterations of alveolar tissue of mice: Iii. Ozone. *Arch Environ Health* 20:468-480.

- Bosson J, Stenfors N, Bucht A, Helleday R, Pourazar J, Holgate ST, et al. 2003. Ozone-induced bronchial epithelial cytokine expression differs between healthy and asthmatic subjects. *Clin Exp Allergy* 33:777-782.
- Buadong D, Jinsart W, Funatagawa I, Karita K, Yano E. 2009. Association between pm10 and o3 levels and hospital visits for cardiovascular diseases in bangkok, thailand. *J Epidemiol* 19:182-188.
- Burra TA, Moineddin R, Agha MM, Glazier RH. 2009. Social disadvantage, air pollution, and asthma physician visits in toronto, canada. *Environ Res* 109:567-574.
- Bush ML, Asplund PT, Miles KA, Ben-Jebria A, Ultman JS. 1996. Longitudinal distribution of o3 absorption in the lung: Gender differences and intersubject variability. *J Appl Physiol* 81:1651-1657.
- Cakmak S, Dales RE, Judek S. 2006a. Do gender, education, and income modify the effect of air pollution gases on cardiac disease? *J Occup Environ Med* 48:89-94.
- Cakmak S, Dales RE, Judek S. 2006b. Respiratory health effects of air pollution gases: Modification by education and income. *Arch Environ Occup Health* 61:5-10.
- Cakmak S, Dales RE, Vidal CB. 2007. Air pollution and mortality in chile: Susceptibility among the elderly. *Environ Health Perspect* 115:524-527.
- Cakmak S, Dales RE, Angelica Rubio M, Blanco Vidal C. 2011. The risk of dying on days of higher air pollution among the socially disadvantaged elderly. *Environ Res* 111:388-393.
- Carbajal-Arroyo L, Miranda-Soberanis V, Medina-Ramón M, Rojas-Bracho L, Tzintzun G, Solís-Gutiérrez P, et al. 2011. Effect of pm10 and o3 on infant mortality among residents in the mexico city metropolitan area: A case-crossover analysis, 1997-2005. *J Epidemiol Community Health* 65:715-721.
- Carey SA, Minard KR, Trease LL, Wagner JG, Garcia GJ, Ballinger CA, et al. 2007. Three-dimensional mapping of ozone-induced injury in the nasal airways of monkeys using magnetic resonance imaging and morphometric techniques. *Toxicol Pathol* 35:27-40.
- CDC. 2004. The health consequences of smoking: A report of the Surgeon General. Washington, DC. [http://www.cdc.gov/tobacco/data\\_statistics/sgr/2004/complete\\_report/index.htm](http://www.cdc.gov/tobacco/data_statistics/sgr/2004/complete_report/index.htm)
- Chhabra SK, Yasir A, Chaudhry K, Shah B. 2010. Effect of ozone on response to ovalbumin & its modulation by vitamins c & e in sensitized guinea pigs. *Indian J Med Res* 132:87-93.



- Escamilla-Nuñez MC, Barraza-Villarreal A, Hernandez-Cadena L, Moreno-Macias H, Ramirez-Aguilar M, Sienra-Monge JJ, et al. 2008. Traffic-related air pollution and respiratory symptoms among asthmatic children, resident in Mexico City: The EVA cohort study. *Respir Res* 9:74.
- Fanucchi MV, Plopper CG, Evans MJ, Hyde DM, Van Winkle LS, Gershwin LJ, et al. 2006. Cyclic exposure to ozone alters distal airway development in infant rhesus monkeys. *Am J Physiol Lung Cell Mol Physiol* 291:L644-L650.
- Fortino V, Maioli E, Torricelli C, Davis P, Valacchi G. 2007. Cutaneous MMPs are differently modulated by environmental stressors in old and young mice. *Toxicol Lett* 173:73-79.
- Funabashi H, Shima M, Kuwaki T, Hiroshima K, Kuriyama T. 2004. Effects of repeated ozone exposure on pulmonary function and bronchial responsiveness in mice sensitized with ovalbumin. *Toxicology* 204:75-83.
- Halonen JJ, Lanki T, Tiittanen P, Niemi JV, Loh M, Pekkanen J. 2009. Ozone and cause-specific cardiorespiratory morbidity and mortality. *J Epidemiol Community Health* 64:814-820.
- Hamade AK, Tankersley CG. 2009. Interstrain variation in cardiac and respiratory adaptation to repeated ozone and particulate matter exposures. *Am J Physiol Regul Integr Comp Physiol* 296:R1202-R1215.
- Hamade AK, Misra V, Rabold R, Tankersley CG. 2010. Age-related changes in cardiac and respiratory adaptation to acute ozone and carbon black exposures: Interstrain variation in mice. *Inhal Toxicol* 22:84-94.
- Hansen CA, Barnett AG, Pritchard G. 2008. The effect of ambient air pollution during early pregnancy on fetal ultrasonic measurements during mid-pregnancy. *Environ Health Perspect* 116:362-369.
- Harkema JR, Plopper CG, Hyde DM, St George JA, Dungworth DL. 1987. Effects of an ambient level of ozone on primate nasal epithelial mucosubstances: Quantitative histochemistry. *Am J Pathol* 127:90-96.
- Hazucha MJ, Folinsbee LJ, Bromberg PA. 2003. Distribution and reproducibility of spirometric response to ozone by gender and age. *J Appl Physiol* 95:1917-1925.
- Henrotin JB, Besancenot JP, Bejot Y, Giroud M. 2007. Short-term effects of ozone air pollution on ischaemic stroke occurrence: A case-crossover analysis from a 10-year population-based study in Dijon, France. *Occup Environ Med* 64:439-445.

- Hernandez ML, Lay JC, Harris B, Esther CR, Brickey WJ, Bromberg PA, et al. 2010. Atopic asthmatic subjects but not atopic subjects without asthma have enhanced inflammatory response to ozone. *J Allergy Clin Immunol* 126:537-544.
- HERO (Health and Environmental Research Online). 2014. HERO's scientific studies and other references database. Available: <http://hero.epa.gov/>
- Hill AB. 1965. The environment and disease: Association or causation? *Proc R Soc Med* 58(5): 295-300.
- Horstman DH, Ball BA, Brown J, Gerrity T, Folinsbee LJ. 1995. Comparison of pulmonary responses of asthmatic and nonasthmatic subjects performing light exercise while exposed to a low level of ozone. *Toxicol Ind Health* 11:369-385.
- Hu SC, Ben-Jebria A, Ultman JS. 1994. Longitudinal distribution of ozone absorption in the lung: Effects of respiratory flow. *J Appl Physiol* 77:574-583.
- Joad JP, Kott KS, Bric JM, Peake JL, Plopper CG, Schelegle ES, et al. 2006. Structural and functional localization of airway effects from episodic exposure of infant monkeys to allergen and/or ozone. *Toxicol Appl Pharmacol* 214:237-243.
- Johnston RA, Theman TA, Lu FL, Terry RD, Williams ES, Shore SA. 2008. Diet-induced obesity causes innate airway hyperresponsiveness to methacholine and enhances ozone-induced pulmonary inflammation. *J Appl Physiol* 104:1727-1735.
- Jorres R, Nowak D, Magnussen H, Speckin P, Koschyk S. 1996. The effect of ozone exposure on allergen responsiveness in subjects with asthma or rhinitis. *Am J Respir Crit Care Med* 153:56-64.
- Kan H, London SJ, Chen G, Zhang Y, Song G, Zhao N, et al. 2008. Season, sex, age, and education as modifiers of the effects of outdoor air pollution on daily mortality in shanghai, china: The public health and air pollution in asia (papa) study. *Environ Health Perspect* 116:1183-1188.
- Katsouyanni K, Samet JM, Anderson HR, Atkinson R, Le Tertre A, Medina S, et al. 2009. Air pollution and health: A european and north american approach (aphena). Research Report 142. Boston, MA:Health Effects Institute.
- Ko FWS, Tam W, Wong TW, Lai CKW. 2007. Effects of air pollution on asthma hospitalization rates in different age groups in hong kong. *Clin Exp Allergy* 37:1312-1319.

- Kodavanti UP, Costa DL, Dreher KL, Crissman K, Hatch GE. 1995. Ozone-induced tissue injury and changes in antioxidant homeostasis in normal and ascorbate-deficient guinea pigs. *Biochem Pharmacol* 50:243-251.
- Kreit JW, Gross KB, Moore TB, Lorenzen TJ, D'Arcy J, Eschenbacher WL. 1989. Ozone-induced changes in pulmonary function and bronchial responsiveness in asthmatics. *J Appl Physiol* 66:217-222.
- Lee JT, Son JY, Kim H, Kim SY. 2006. Effect of air pollution on asthma-related hospital admissions for children by socioeconomic status associated with area of residence. *Arch Environ Occup Health* 61:123-130.
- Lim Y, Phung AD, Corbacho AM, Aung HH, Maioli E, Reznick AZ, et al. 2006. Modulation of cutaneous wound healing by ozone: Differences between young and aged mice. *Toxicol Lett* 160:127-134.
- Lin M, Stieb DM, Chen Y. 2005. Coarse particulate matter and hospitalization for respiratory infections in children younger than 15 years in toronto: A case-crossover analysis. *Pediatrics* 116:235-240.
- Lin S, Liu X, Le LH, Hwang SA. 2008. Chronic exposure to ambient ozone and asthma hospital admissions among children. *Environ Health Perspect* 116:1725-1730.
- López I, Sánchez I, Bizarro P, Acevedo S, Ustarroz M, Fortoul T. 2008. Ultrastructural alterations during embryonic rats' lung development caused by ozone. *J Electron Microsc (Tokyo)* 57:19-23.
- Mar TF, Koenig JQ. 2009. Relationship between visits to emergency departments for asthma and ozone exposure in greater seattle, washington. *Ann Allergy Asthma Immunol* 103:474-479.
- McDonnell WF, Stewart PW, Smith MV, Pan WK, Pan J. 1999. Ozone-induced respiratory symptoms: Exposure-response models and association with lung function. *Eur Respir J* 14:845-853.
- McDonnell WF, Stewart PW, Smith MV. 2010. Prediction of ozone-induced lung function responses in humans. *Inhal Toxicol* 22:160-168.
- Medina-Ramón M, Schwartz J. 2008. Who is more vulnerable to die from ozone air pollution? *Epidemiology* 19:672-679.

- Middleton N, Yiallourous P, Kleanthous S, Kolokotroni O, Schwartz J, Dockery DW, et al. 2008. A 10-year time-series analysis of respiratory and cardiovascular morbidity in nicosia, cyprus: The effect of short-term changes in air pollution and dust storms. *Environ Health* 7:39.
- Morello-Frosch R, Jesdale BM, Sadd JL, Pastor M. 2010. Ambient air pollution exposure and full-term birth weight in california. *Environ Health* 9:44.
- Mudway IS, Stenfors N, Blomberg A, Helleday R, Dunster C, Marklund SL, et al. 2001. Differences in basal airway antioxidant concentrations are not predictive of individual responsiveness to ozone: A comparison of healthy and mild asthmatic subjects. *Free Radic Biol Med* 31:962-974.
- Nodelman V, Ultman JS. 1999. Longitudinal distribution of chlorine absorption in human airways: A comparison to ozone absorption. *J Appl Physiol* 87:2073-2080.
- Oyarzún M, Dussaubat N, González S. 2005. Effect of 0.25 ppm ozone exposure on pulmonary damage induced by bleomycin. *Biol Res* 38:353-358.
- Paquette NC, Zhang LY, Ellis WA, Scott AL, Kleeberger SR. 1996. Vitamin a deficiency enhances ozone-induced lung injury. *Am J Physiol* 270:L475-L482.
- Paulu C, Smith AE. 2008. Tracking associations between ambient ozone and asthma-related emergency department visits using case-crossover analysis. *J Public Health Manag Pract* 14:581-591.
- Peden DB, Boehlecke B, Horstman D, Devlin R. 1997. Prolonged acute exposure to 0.16 ppm ozone induces eosinophilic airway inflammation in asthmatic subjects with allergies. *J Allergy Clin Immunol* 100:802-808.
- Plopper CG, Smiley-Jewell SM, Miller LA, Fanucchi MV, Evans MJ, Buckpitt AR, et al. 2007. Asthma/allergic airways disease: Does postnatal exposure to environmental toxicants promote airway pathobiology? *Toxicol Pathol* 35:97-110.
- Rivas-Arancibia S, Dorado-Martinez C, Borgonio-Perez G, Hiriart-Urdanivia M, Verdugo-Diaz L, Duran-Vazquez A, et al. 2000. Effects of taurine on ozone-induced memory deficits and lipid peroxidation levels in brains of young, mature, and old rats. *Environ Res* 82:7-17.
- Romieu I, Ramirez-Aguilar M, Moreno-Macias H, Barraza-Villarreal A, Miller P, Hernandez-Cadena L, et al. 2004. Infant mortality and air pollution: Modifying effect by social class. *J Occup Environ Hyg* 46:1210-1216.

- Romieu I, Barraza-Villarreal A, Escamilla-Núñez C, Texcalac-Sangrador JL, Hernandez-Cadena L, Díaz-Sánchez D, et al. 2009. Dietary intake, lung function and airway inflammation in Mexico city school children exposed to air pollutants. *Respir Res* 10:122.
- Samet JM, Hatch GE, Horstman D, Steck-Scott S, Arab L, Bromberg PA, et al. 2001. Effect of antioxidant supplementation on ozone-induced lung injury in human subjects. *Am J Respir Crit Care Med* 164:819-825.
- Scannell C, Chen L, Aris RM, Tager I, Christian D, Ferrando R, et al. 1996. Greater ozone-induced inflammatory responses in subjects with asthma. *Am J Respir Crit Care Med* 154:24-29.
- Schelegle ES, Miller LA, Gershwin LJ, Fanucchi MV, Van Winkle LS, Gerriets JE, et al. 2003. Repeated episodes of ozone inhalation amplifies the effects of allergen sensitization and inhalation on airway immune and structural development in rhesus monkeys. *Toxicol Appl Pharmacol* 191:74-85.
- Seal E, Jr, McDonnell WF, House DE. 1996. Effects of age, socioeconomic status, and menstrual cycle on pulmonary response to ozone. *Arch Environ Occup Health* 51:132-137.
- Servais S, Boussouar A, Molnar A, Douki T, Pequignot JM, Favier R. 2005. Age-related sensitivity to lung oxidative stress during ozone exposure. *Free Radic Res* 39:305-316.
- Shore SA, Lang JE, Kasahara DI, Lu FL, Verboort NG, Si H, et al. 2009. Pulmonary responses to subacute ozone exposure in obese vs. Lean mice. *J Appl Physiol* 107:1445-1452.
- Sienra-Monge JJ, Ramirez-Aguilar M, Moreno-Macias H, Reyes-Ruiz NI, Del Rio-Navarro BE, Ruiz-Navarro MX, et al. 2004. Antioxidant supplementation and nasal inflammatory responses among young asthmatics exposed to high levels of ozone. *Clin Exp Immunol* 138:317-322.
- Silverman RA, Ito K. 2010. Age-related association of fine particles and ozone with severe acute asthma in New York City. *J Allergy Clin Immunol* 125:367-373.
- Stafoggia M, Forastiere F, Faustini A, Biggeri A, Bisanti L, Cadum E, et al. 2010. Susceptibility factors to ozone-related mortality: A population-based case-crossover analysis. *Am J Respir Crit Care Med* 182:376-384.
- Tankersley CG, Peng RD, Bedga D, Gabrielson K, Champion HC. 2010. Variation in echocardiographic and cardiac hemodynamic effects of PM and ozone inhalation exposure in strains related to NPPA and NPR1 gene knock-out mice. *Inhal Toxicol* 22:695-707.

- Thaller EI, Petronella SA, Hochman D, Howard S, Chhikara RS, Brooks EG. 2008. Moderate increases in ambient pm2.5 and ozone are associated with lung function decreases in beach lifeguards. *J Occup Environ Med* 50:202-211.
- Tovalin H, Valverde M, Morandi MT, Blanco S, Whitehead L, Rojas E. 2006. DNA damage in outdoor workers occupationally exposed to environmental air pollutants. *Occup Environ Med* 63:230-236.
- Trenga CA, Koenig JQ, Williams PV. 2001. Dietary antioxidants and ozone-induced bronchial hyperresponsiveness in adults with asthma. *Arch Environ Occup Health* 56:242-249.
- U.S. EPA. 2005. Guidelines for carcinogen risk assessment. EPA/630/P-03/001F. Washington, DC. <http://www.epa.gov/cancerguidelines/>
- U.S. EPA. 2008. Notice of Workshop and Call for Information on Integrated Science Assessment for Ozone. FRL-8722-2; Docket ID EPA-HQ-OAR-2008-0699. Washington, DC. <http://www.gpo.gov/fdsys/pkg/FR-2008-09-29/html/E8-22799.htm>
- U.S. EPA. 2009. Integrated science assessment for particulate matter. EPA/600/R-08/139F. Research Triangle Park, NC. <http://cfpub.epa.gov/ncea/cfm/recordisplay.cfm?deid=216546>
- U.S. EPA. 2011. National Ambient Air Quality Standards. Available: <http://www.epa.gov/air/criteria.html>
- U.S. EPA. 2013. Integrated science assessment for ozone and related photochemical oxidants. EPA/600/R-10/076F. Research Triangle Park, NC. <http://cfpub.epa.gov/ncea/isa/recordisplay.cfm?deid=247492>
- U.S. EPA. 2014. EPA Clean Air Scientific Advisory Committee. Available: [www.epa.gov/casac](http://www.epa.gov/casac)
- Valacchi G, Pecorelli A, Mencarelli M, Maioli E, Davis PA. 2009. Beta-carotene prevents ozone-induced proinflammatory markers in murine skin. *Toxicol Ind Health* 25:241-247.
- Vancza EM, Galdanes K, Gunnison A, Hatch G, Gordon T. 2009. Age, strain, and gender as factors for increased sensitivity of the mouse lung to inhaled ozone. *Toxicol Sci* 107:535-543.
- Villeneuve PJ, Chen L, Stieb D, Rowe BH. 2006. Associations between outdoor air pollution and emergency department visits for stroke in edmonton, canada. *Eur J Epidemiol* 21:689-700.
- Wagner JG, Jiang Q, Harkema JR, Illek B, Patel DD, Ames BN, et al. 2007. Ozone enhancement of lower airway allergic inflammation is prevented by gamma-tocopherol. *Free Radic Biol Med* 43:1176-1188.

- Wagner JG, Harkema JR, Jiang Q, Illek B, Ames BN, Peden DB. 2009. Gamma-tocopherol attenuates ozone-induced exacerbation of allergic rhinosinusitis in rats. *Toxicol Pathol* 37:481-491.
- Wong CM, Ou CQ, Chan KP, Chau YK, Thach TQ, Yang L, et al. 2008. The effects of air pollution on mortality in socially deprived urban areas in hong kong, china. *Environ Health Perspect* 116:1189-1194.
- Wong CM, Yang L, Thach TQ, Chau PY, Chan KP, Thomas GN, et al. 2009. Modification by influenza on health effects of air pollution in hong kong. *Environ Health Perspect* 117:248-253.
- Zanobetti A, Schwartz J. 2008. Is there adaptation in the ozone mortality relationship: A multi-city case-crossover analysis. *Environ Health* 7:22.
